# Supplementary material for: Recombination shapes the diversification of the wtf meiotic drivers
Source: eLife. 2026 May 11;13:RP100638. doi: 10.7554/eLife.100638 (PMC13160552; doi:10.7554/eLife.100638)
Supplement: Figure 1—source data 1. [file elife-100638-fig1-data1.xlsx]

## Sheet: Fig1A
gene	start	end	transcript	exon
wtf1	1	139	wtf1exon	1
wtf1	307	552	wtf1exon	2
wtf1	600	830	wtf1exon	3
wtf1	872	925	wtf1exon	4
wtf1	980	1056	wtf1exon	5
wtf2	1	139	wtf2exon	1
wtf2	183	208	wtf2exon	2
wtf2	315	391	wtf2exon	3
wtf3	1	139	wtf3exon	1
wtf3	308	553	wtf3exon	2
wtf3	603	878	wtf3exon	3
wtf3	919	972	wtf3exon	4
wtf3	1026	1102	wtf3exon	5
wtf4	1	136	wtf4exon	1
wtf4	365	637	wtf4exon	2
wtf4	686	976	wtf4exon	3
wtf4	1013	1204	wtf4exon	4
wtf4	1245	1307	wtf4exon	5
wtf4	1358	1503	wtf4exon	6
wtf5	1	139	wtf5exon	1
wtf5	306	551	wtf5exon	2
wtf5	601	906	wtf5exon	3
wtf5	948	989	wtf5exon	4
wtf5	1039	1115	wtf5exon	5
wtf6	1	140	wtf6exon	1
wtf6	309	554	wtf6exon	2
wtf6	604	910	wtf6exon	3
wtf6	952	993	wtf6exon	4
wtf6	1043	1119	wtf6exon	5
wtf7	1	139	wtf7exon	1
wtf7	348	719	wtf7exon	2
wtf7	771	907	wtf7exon	3
wtf8	1	139	wtf8exon	1
wtf8	308	553	wtf8exon	2
wtf8	603	846	wtf8exon	3
wtf8	892	1083	wtf8exon	4
wtf8	1124	1186	wtf8exon	5
wtf8	1237	1319	wtf8exon	6
wtf9	1	139	wtf9exon	1
wtf9	307	552	wtf9exon	2
wtf9	602	880	wtf9exon	3
wtf9	926	1117	wtf9exon	4
wtf9	1158	1220	wtf9exon	5
wtf9	1271	1353	wtf9exon	6
wtf10	1	139	wtf10exon	1
wtf10	309	554	wtf10exon	2
wtf10	604	876	wtf10exon	3
wtf10	918	959	wtf10exon	4
wtf10	1009	1085	wtf10exon	5
wtf11	1	157	wtf11exon	1
wtf11	320	640	wtf11exon	2
wtf11	688	918	wtf11exon	3
wtf11	957	1009	wtf11exon	4
wtf11	1066	1098	wtf11exon	5
wtf12	1	139	wtf12exon	1
wtf12	371	643	wtf12exon	2
wtf12	692	919	wtf12exon	3
wtf12	961	1143	wtf12exon	4
wtf13	1	136	wtf13exon	1
wtf13	368	640	wtf13exon	2
wtf13	689	1045	wtf13exon	3
wtf13	1082	1273	wtf13exon	4
wtf13	1314	1376	wtf13exon	5
wtf13	1427	1572	wtf13exon	6
wtf14	1	130	wtf14exon	1
wtf14	202	426	wtf14exon	2
wtf14	476	727	wtf14exon	3
wtf14	768	830	wtf14exon	4
wtf14	894	913	wtf14exon	5
wtf15	1	139	wtf15exon	1
wtf15	345	602	wtf15exon	2
wtf15	650	886	wtf15exon	3
wtf15	926	982	wtf15exon	4
wtf15	1042	1118	wtf15exon	5
wtf16	1	139	wtf16exon	1
wtf16	307	552	wtf16exon	2
wtf16	602	814	wtf16exon	3
wtf16	860	1051	wtf16exon	4
wtf16	1092	1154	wtf16exon	5
wtf16	1205	1311	wtf16exon	6
wtf17	1	139	wtf17exon	1
wtf17	306	551	wtf17exon	2
wtf17	601	822	wtf17exon	3
wtf17	863	916	wtf17exon	4
wtf17	973	1049	wtf17exon	5
wtf18	1	139	wtf18exon	1
wtf18	378	650	wtf18exon	2
wtf18	699	1022	wtf18exon	3
wtf18	1059	1250	wtf18exon	4
wtf18	1291	1353	wtf18exon	5
wtf18	1404	1531	wtf18exon	6
wtf19	1	136	wtf19exon	1
wtf19	352	681	wtf19exon	2
wtf19	731	1108	wtf19exon	3
wtf19	1145	1336	wtf19exon	4
wtf19	1377	1439	wtf19exon	5
wtf19	1490	1572	wtf19exon	6
wtf20	1	139	wtf20exon	1
wtf20	378	650	wtf20exon	2
wtf20	699	932	wtf20exon	3
wtf20	973	1026	wtf20exon	4
wtf20	1081	1157	wtf20exon	5
wtf21	1	139	wtf21exon	1
wtf21	307	552	wtf21exon	2
wtf21	600	845	wtf21exon	3
wtf21	882	1073	wtf21exon	4
wtf21	1114	1176	wtf21exon	5
wtf21	1227	1330	wtf21exon	6
wtf22	1	138	wtf22exon	1
wtf22	308	556	wtf22exon	2
wtf22	606	884	wtf22exon	3
wtf22	921	1093	wtf22exon	4
wtf22	1134	1196	wtf22exon	5
wtf22	1248	1351	wtf22exon	6
wtf23	1	136	wtf23exon	1
wtf23	353	682	wtf23exon	2
wtf23	732	1010	wtf23exon	3
wtf23	1047	1238	wtf23exon	4
wtf23	1279	1341	wtf23exon	5
wtf23	1392	1498	wtf23exon	6
wtf24	1	139	wtf24exon	1
wtf24	307	555	wtf24exon	2
wtf24	605	828	wtf24exon	3
wtf24	874	1065	wtf24exon	4
wtf24	1106	1168	wtf24exon	5
wtf24	1219	1301	wtf24exon	6
wtf25	1	139	wtf25exon	1
wtf25	306	551	wtf25exon	2
wtf25	601	834	wtf25exon	3
wtf25	875	928	wtf25exon	4
wtf25	989	1065	wtf25exon	5
