# Supplementary material for: Recombination shapes the diversification of the wtf meiotic drivers
Source: eLife. 2026 May 11;13:RP100638. doi: 10.7554/eLife.100638 (PMC13160552; doi:10.7554/eLife.100638)
Supplement: Figure 1—source data 2. [file elife-100638-fig1-data2.xlsx]

## Sheet: Fig1B
exon	exon	indentity
wtf1exon1	wtf10exon1	91.37
wtf1exon2	wtf10exon1	11.51
wtf1exon3	wtf10exon1	16.48
wtf1exon4	wtf10exon1	12.24
wtf1exon5	wtf10exon1	16.45
wtf2exon1	wtf10exon1	89.21
wtf2exon2	wtf10exon1	3.31
wtf2exon3	wtf10exon1	17.11
wtf3exon1	wtf10exon1	89.93
wtf3exon2	wtf10exon1	9.71
wtf3exon3	wtf10exon1	17.89
wtf3exon4	wtf10exon1	10.2
wtf3exon5	wtf10exon1	16.45
wtf4exon1	wtf10exon1	68.35
wtf4exon2	wtf10exon1	14.81
wtf4exon3	wtf10exon1	16.11
wtf4exon4	wtf10exon1	10.46
wtf4exon5	wtf10exon1	3.72
wtf4exon6	wtf10exon1	22.67
wtf5exon1	wtf10exon1	89.21
wtf5exon2	wtf10exon1	9.71
wtf5exon3	wtf10exon1	18.15
wtf5exon4	wtf10exon1	9.29
wtf5exon5	wtf10exon1	17.11
wtf6exon1	wtf10exon1	89.29
wtf6exon2	wtf10exon1	9.71
wtf6exon3	wtf10exon1	18.1
wtf6exon4	wtf10exon1	9.29
wtf6exon5	wtf10exon1	15.13
wtf7exon1	wtf10exon1	55.63
wtf7exon2	wtf10exon1	8.25
wtf7exon3	wtf10exon1	11.65
wtf8exon1	wtf10exon1	92.09
wtf8exon2	wtf10exon1	8.99
wtf8exon3	wtf10exon1	16.04
wtf8exon4	wtf10exon1	10.46
wtf8exon5	wtf10exon1	3.72
wtf8exon6	wtf10exon1	21.23
wtf9exon1	wtf10exon1	92.09
wtf9exon2	wtf10exon1	8.99
wtf9exon3	wtf10exon1	17.48
wtf9exon4	wtf10exon1	11.3
wtf9exon5	wtf10exon1	3.72
wtf9exon6	wtf10exon1	21.23
wtf10exon1	wtf10exon1	100
wtf10exon2	wtf10exon1	9.71
wtf10exon3	wtf10exon1	20.57
wtf10exon4	wtf10exon1	9.29
wtf10exon5	wtf10exon1	17.76
wtf11exon1	wtf10exon1	61.15
wtf11exon2	wtf10exon1	9.09
wtf11exon3	wtf10exon1	13.79
wtf11exon4	wtf10exon1	10.88
wtf11exon5	wtf10exon1	4.38
wtf12exon1	wtf10exon1	85.61
wtf12exon2	wtf10exon1	12.79
wtf12exon3	wtf10exon1	16.92
wtf12exon4	wtf10exon1	18.4
wtf13exon1	wtf10exon1	68.35
wtf13exon2	wtf10exon1	15.15
wtf13exon3	wtf10exon1	13.97
wtf13exon4	wtf10exon1	10.46
wtf13exon5	wtf10exon1	3.72
wtf13exon6	wtf10exon1	22.67
wtf14exon1	wtf10exon1	46.43
wtf14exon2	wtf10exon1	10
wtf14exon3	wtf10exon1	13.64
wtf14exon4	wtf10exon1	2.66
wtf14exon5	wtf10exon1	1.31
wtf15exon1	wtf10exon1	70.5
wtf15exon2	wtf10exon1	11.37
wtf15exon3	wtf10exon1	13.16
wtf15exon4	wtf10exon1	11.43
wtf15exon5	wtf10exon1	19.74
wtf16exon1	wtf10exon1	89.21
wtf16exon2	wtf10exon1	11.51
wtf16exon3	wtf10exon1	14.46
wtf16exon4	wtf10exon1	10.88
wtf16exon5	wtf10exon1	3.72
wtf16exon6	wtf10exon1	27.4
wtf17exon1	wtf10exon1	88.49
wtf17exon2	wtf10exon1	10.07
wtf17exon3	wtf10exon1	15.06
wtf17exon4	wtf10exon1	12.24
wtf17exon5	wtf10exon1	17.11
wtf18exon1	wtf10exon1	91.37
wtf18exon2	wtf10exon1	13.13
wtf18exon3	wtf10exon1	14.55
wtf18exon4	wtf10exon1	10.46
wtf18exon5	wtf10exon1	3.72
wtf18exon6	wtf10exon1	29.14
wtf19exon1	wtf10exon1	69.78
wtf19exon2	wtf10exon1	9.42
wtf19exon3	wtf10exon1	12.99
wtf19exon4	wtf10exon1	12.97
wtf19exon5	wtf10exon1	4.79
wtf19exon6	wtf10exon1	18.49
wtf20exon1	wtf10exon1	91.37
wtf20exon2	wtf10exon1	13.47
wtf20exon3	wtf10exon1	15.15
wtf20exon4	wtf10exon1	14.29
wtf20exon5	wtf10exon1	15.13
wtf21exon1	wtf10exon1	92.09
wtf21exon2	wtf10exon1	11.51
wtf21exon3	wtf10exon1	13.83
wtf21exon4	wtf10exon1	12.97
wtf21exon5	wtf10exon1	4.79
wtf21exon6	wtf10exon1	23.97
wtf22exon1	wtf10exon1	92.09
wtf22exon2	wtf10exon1	11.03
wtf22exon3	wtf10exon1	17.48
wtf22exon4	wtf10exon1	10.91
wtf22exon5	wtf10exon1	4.26
wtf22exon6	wtf10exon1	23.97
wtf23exon1	wtf10exon1	69.06
wtf23exon2	wtf10exon1	9.42
wtf23exon3	wtf10exon1	17.48
wtf23exon4	wtf10exon1	12.97
wtf23exon5	wtf10exon1	4.26
wtf23exon6	wtf10exon1	26.03
wtf24exon1	wtf10exon1	87.05
wtf24exon2	wtf10exon1	11.03
wtf24exon3	wtf10exon1	13.73
wtf24exon4	wtf10exon1	10.88
wtf24exon5	wtf10exon1	4.79
wtf24exon6	wtf10exon1	19.18
wtf25exon1	wtf10exon1	90.65
wtf25exon2	wtf10exon1	10.07
wtf25exon3	wtf10exon1	17.05
wtf25exon4	wtf10exon1	12.24
wtf25exon5	wtf10exon1	16.45
wtf1exon1	wtf10exon2	10.43
wtf1exon2	wtf10exon2	91.46
wtf1exon3	wtf10exon2	30.51
wtf1exon4	wtf10exon2	9.49
wtf1exon5	wtf10exon2	9.65
wtf2exon1	wtf10exon2	10.79
wtf2exon2	wtf10exon2	3.98
wtf2exon3	wtf10exon2	8.49
wtf3exon1	wtf10exon2	11.15
wtf3exon2	wtf10exon2	100
wtf3exon3	wtf10exon2	28.04
wtf3exon4	wtf10exon2	7.91
wtf3exon5	wtf10exon2	10.81
wtf4exon1	wtf10exon2	12.23
wtf4exon2	wtf10exon2	27.8
wtf4exon3	wtf10exon2	19.46
wtf4exon4	wtf10exon2	24.25
wtf4exon5	wtf10exon2	6.59
wtf4exon6	wtf10exon2	12.88
wtf5exon1	wtf10exon2	10.79
wtf5exon2	wtf10exon2	94.72
wtf5exon3	wtf10exon2	29.36
wtf5exon4	wtf10exon2	5.53
wtf5exon5	wtf10exon2	8.49
wtf6exon1	wtf10exon2	11.11
wtf6exon2	wtf10exon2	100
wtf6exon3	wtf10exon2	29.36
wtf6exon4	wtf10exon2	5.53
wtf6exon5	wtf10exon2	8.88
wtf7exon1	wtf10exon2	12.95
wtf7exon2	wtf10exon2	30.38
wtf7exon3	wtf10exon2	16.73
wtf8exon1	wtf10exon2	10.43
wtf8exon2	wtf10exon2	91.87
wtf8exon3	wtf10exon2	18.77
wtf8exon4	wtf10exon2	25.75
wtf8exon5	wtf10exon2	6.98
wtf8exon6	wtf10exon2	10.08
wtf9exon1	wtf10exon2	10.07
wtf9exon2	wtf10exon2	94.72
wtf9exon3	wtf10exon2	21.67
wtf9exon4	wtf10exon2	24.25
wtf9exon5	wtf10exon2	6.98
wtf9exon6	wtf10exon2	10.08
wtf10exon1	wtf10exon2	9.71
wtf10exon2	wtf10exon2	100
wtf10exon3	wtf10exon2	31.63
wtf10exon4	wtf10exon2	5.53
wtf10exon5	wtf10exon2	8.88
wtf11exon1	wtf10exon2	14.64
wtf11exon2	wtf10exon2	33.63
wtf11exon3	wtf10exon2	30.51
wtf11exon4	wtf10exon2	4.74
wtf11exon5	wtf10exon2	7.32
wtf12exon1	wtf10exon2	10.79
wtf12exon2	wtf10exon2	29.83
wtf12exon3	wtf10exon2	29.04
wtf12exon4	wtf10exon2	15.09
wtf13exon1	wtf10exon2	12.23
wtf13exon2	wtf10exon2	27.46
wtf13exon3	wtf10exon2	16.96
wtf13exon4	wtf10exon2	24.25
wtf13exon5	wtf10exon2	6.59
wtf13exon6	wtf10exon2	12.88
wtf14exon1	wtf10exon2	13.31
wtf14exon2	wtf10exon2	41.2
wtf14exon3	wtf10exon2	30.42
wtf14exon4	wtf10exon2	6.98
wtf14exon5	wtf10exon2	1.15
wtf15exon1	wtf10exon2	12.59
wtf15exon2	wtf10exon2	23.1
wtf15exon3	wtf10exon2	26.43
wtf15exon4	wtf10exon2	5.43
wtf15exon5	wtf10exon2	8.49
wtf16exon1	wtf10exon2	10.43
wtf16exon2	wtf10exon2	93.5
wtf16exon3	wtf10exon2	17.93
wtf16exon4	wtf10exon2	24.63
wtf16exon5	wtf10exon2	6.98
wtf16exon6	wtf10exon2	11.83
wtf17exon1	wtf10exon2	11.15
wtf17exon2	wtf10exon2	87.8
wtf17exon3	wtf10exon2	25.55
wtf17exon4	wtf10exon2	9.09
wtf17exon5	wtf10exon2	9.65
wtf18exon1	wtf10exon2	9.35
wtf18exon2	wtf10exon2	27.46
wtf18exon3	wtf10exon2	17.71
wtf18exon4	wtf10exon2	24.25
wtf18exon5	wtf10exon2	6.98
wtf18exon6	wtf10exon2	13.14
wtf19exon1	wtf10exon2	11.87
wtf19exon2	wtf10exon2	51.95
wtf19exon3	wtf10exon2	15.95
wtf19exon4	wtf10exon2	25.37
wtf19exon5	wtf10exon2	5.04
wtf19exon6	wtf10exon2	10.85
wtf20exon1	wtf10exon2	9.71
wtf20exon2	wtf10exon2	27.8
wtf20exon3	wtf10exon2	26.64
wtf20exon4	wtf10exon2	9.49
wtf20exon5	wtf10exon2	8.88
wtf21exon1	wtf10exon2	10.07
wtf21exon2	wtf10exon2	90.24
wtf21exon3	wtf10exon2	18.45
wtf21exon4	wtf10exon2	24.63
wtf21exon5	wtf10exon2	5.04
wtf21exon6	wtf10exon2	13.36
wtf22exon1	wtf10exon2	9.35
wtf22exon2	wtf10exon2	73.09
wtf22exon3	wtf10exon2	21.05
wtf22exon4	wtf10exon2	19.1
wtf22exon5	wtf10exon2	5.43
wtf22exon6	wtf10exon2	12.21
wtf23exon1	wtf10exon2	11.87
wtf23exon2	wtf10exon2	52.55
wtf23exon3	wtf10exon2	20.74
wtf23exon4	wtf10exon2	25.37
wtf23exon5	wtf10exon2	5.04
wtf23exon6	wtf10exon2	11.83
wtf24exon1	wtf10exon2	11.15
wtf24exon2	wtf10exon2	74.3
wtf24exon3	wtf10exon2	18.33
wtf24exon4	wtf10exon2	23.88
wtf24exon5	wtf10exon2	6.98
wtf24exon6	wtf10exon2	10.85
wtf25exon1	wtf10exon2	9.71
wtf25exon2	wtf10exon2	94.31
wtf25exon3	wtf10exon2	25.91
wtf25exon4	wtf10exon2	9.09
wtf25exon5	wtf10exon2	8.11
wtf1exon1	wtf10exon3	19.5
wtf1exon2	wtf10exon3	30.61
wtf1exon3	wtf10exon3	76.19
wtf1exon4	wtf10exon3	7.86
wtf1exon5	wtf10exon3	9.39
wtf2exon1	wtf10exon3	18.79
wtf2exon2	wtf10exon3	4.38
wtf2exon3	wtf10exon3	9.39
wtf3exon1	wtf10exon3	19.15
wtf3exon2	wtf10exon3	31.63
wtf3exon3	wtf10exon3	73.91
wtf3exon4	wtf10exon3	6.79
wtf3exon5	wtf10exon3	11.19
wtf4exon1	wtf10exon3	17.73
wtf4exon2	wtf10exon3	28.62
wtf4exon3	wtf10exon3	42.55
wtf4exon4	wtf10exon3	29.3
wtf4exon5	wtf10exon3	6.23
wtf4exon6	wtf10exon3	12.58
wtf5exon1	wtf10exon3	18.79
wtf5exon2	wtf10exon3	30.95
wtf5exon3	wtf10exon3	83.01
wtf5exon4	wtf10exon3	5.71
wtf5exon5	wtf10exon3	9.39
wtf6exon1	wtf10exon3	19.08
wtf6exon2	wtf10exon3	31.63
wtf6exon3	wtf10exon3	82.41
wtf6exon4	wtf10exon3	5.71
wtf6exon5	wtf10exon3	9.39
wtf7exon1	wtf10exon3	16.9
wtf7exon2	wtf10exon3	21.67
wtf7exon3	wtf10exon3	19.35
wtf8exon1	wtf10exon3	20.57
wtf8exon2	wtf10exon3	29.93
wtf8exon3	wtf10exon3	42.96
wtf8exon4	wtf10exon3	29.3
wtf8exon5	wtf10exon3	6.57
wtf8exon6	wtf10exon3	9.09
wtf9exon1	wtf10exon3	19.15
wtf9exon2	wtf10exon3	31.63
wtf9exon3	wtf10exon3	45.48
wtf9exon4	wtf10exon3	28.57
wtf9exon5	wtf10exon3	6.57
wtf9exon6	wtf10exon3	9.09
wtf10exon1	wtf10exon3	20.57
wtf10exon2	wtf10exon3	31.63
wtf10exon3	wtf10exon3	100
wtf10exon4	wtf10exon3	5.71
wtf10exon5	wtf10exon3	10.11
wtf11exon1	wtf10exon3	21.63
wtf11exon2	wtf10exon3	24.93
wtf11exon3	wtf10exon3	58.97
wtf11exon4	wtf10exon3	7.14
wtf11exon5	wtf10exon3	6.2
wtf12exon1	wtf10exon3	20.21
wtf12exon2	wtf10exon3	27.65
wtf12exon3	wtf10exon3	66.3
wtf12exon4	wtf10exon3	13.25
wtf13exon1	wtf10exon3	17.73
wtf13exon2	wtf10exon3	28.94
wtf13exon3	wtf10exon3	35.31
wtf13exon4	wtf10exon3	29.3
wtf13exon5	wtf10exon3	6.23
wtf13exon6	wtf10exon3	12.58
wtf14exon1	wtf10exon3	15.55
wtf14exon2	wtf10exon3	25.93
wtf14exon3	wtf10exon3	46.4
wtf14exon4	wtf10exon3	5.88
wtf14exon5	wtf10exon3	1.04
wtf15exon1	wtf10exon3	17.02
wtf15exon2	wtf10exon3	26.47
wtf15exon3	wtf10exon3	45.07
wtf15exon4	wtf10exon3	6.79
wtf15exon5	wtf10exon3	10.47
wtf16exon1	wtf10exon3	19.86
wtf16exon2	wtf10exon3	30.27
wtf16exon3	wtf10exon3	35.89
wtf16exon4	wtf10exon3	28.21
wtf16exon5	wtf10exon3	6.57
wtf16exon6	wtf10exon3	11.39
wtf17exon1	wtf10exon3	18.44
wtf17exon2	wtf10exon3	29.93
wtf17exon3	wtf10exon3	55.8
wtf17exon4	wtf10exon3	6.79
wtf17exon5	wtf10exon3	10.83
wtf18exon1	wtf10exon3	20.57
wtf18exon2	wtf10exon3	27.65
wtf18exon3	wtf10exon3	38.59
wtf18exon4	wtf10exon3	29.3
wtf18exon5	wtf10exon3	6.57
wtf18exon6	wtf10exon3	14.18
wtf19exon1	wtf10exon3	17.73
wtf19exon2	wtf10exon3	26.02
wtf19exon3	wtf10exon3	33.74
wtf19exon4	wtf10exon3	31.14
wtf19exon5	wtf10exon3	6.23
wtf19exon6	wtf10exon3	8.36
wtf20exon1	wtf10exon3	20.21
wtf20exon2	wtf10exon3	27.65
wtf20exon3	wtf10exon3	58.7
wtf20exon4	wtf10exon3	7.14
wtf20exon5	wtf10exon3	9.39
wtf21exon1	wtf10exon3	19.15
wtf21exon2	wtf10exon3	30.61
wtf21exon3	wtf10exon3	35.74
wtf21exon4	wtf10exon3	30.77
wtf21exon5	wtf10exon3	6.23
wtf21exon6	wtf10exon3	11.03
wtf22exon1	wtf10exon3	18.79
wtf22exon2	wtf10exon3	32.2
wtf22exon3	wtf10exon3	43.87
wtf22exon4	wtf10exon3	25.64
wtf22exon5	wtf10exon3	5.54
wtf22exon6	wtf10exon3	11.03
wtf23exon1	wtf10exon3	17.38
wtf23exon2	wtf10exon3	26.02
wtf23exon3	wtf10exon3	44.52
wtf23exon4	wtf10exon3	31.14
wtf23exon5	wtf10exon3	5.88
wtf23exon6	wtf10exon3	9.96
wtf24exon1	wtf10exon3	20.21
wtf24exon2	wtf10exon3	31.53
wtf24exon3	wtf10exon3	35.05
wtf24exon4	wtf10exon3	27.84
wtf24exon5	wtf10exon3	6.57
wtf24exon6	wtf10exon3	8.73
wtf25exon1	wtf10exon3	18.79
wtf25exon2	wtf10exon3	30.61
wtf25exon3	wtf10exon3	59.42
wtf25exon4	wtf10exon3	6.79
wtf25exon5	wtf10exon3	9.39
wtf1exon1	wtf10exon4	9.29
wtf1exon2	wtf10exon4	5.14
wtf1exon3	wtf10exon4	4.84
wtf1exon4	wtf10exon4	48.15
wtf1exon5	wtf10exon4	0
wtf2exon1	wtf10exon4	8.57
wtf2exon2	wtf10exon4	12.5
wtf2exon3	wtf10exon4	0
wtf3exon1	wtf10exon4	7.86
wtf3exon2	wtf10exon4	5.53
wtf3exon3	wtf10exon4	5.3
wtf3exon4	wtf10exon4	35.19
wtf3exon5	wtf10exon4	0
wtf4exon1	wtf10exon4	7.86
wtf4exon2	wtf10exon4	5.86
wtf4exon3	wtf10exon4	5.72
wtf4exon4	wtf10exon4	3.15
wtf4exon5	wtf10exon4	0
wtf4exon6	wtf10exon4	12.24
wtf5exon1	wtf10exon4	8.57
wtf5exon2	wtf10exon4	5.93
wtf5exon3	wtf10exon4	5.11
wtf5exon4	wtf10exon4	100
wtf5exon5	wtf10exon4	0
wtf6exon1	wtf10exon4	8.51
wtf6exon2	wtf10exon4	5.53
wtf6exon3	wtf10exon4	5.1
wtf6exon4	wtf10exon4	100
wtf6exon5	wtf10exon4	0
wtf7exon1	wtf10exon4	7.14
wtf7exon2	wtf10exon4	3.46
wtf7exon3	wtf10exon4	5.59
wtf8exon1	wtf10exon4	8.57
wtf8exon2	wtf10exon4	5.14
wtf8exon3	wtf10exon4	4.12
wtf8exon4	wtf10exon4	2.7
wtf8exon5	wtf10exon4	0
wtf8exon6	wtf10exon4	3.42
wtf9exon1	wtf10exon4	8.57
wtf9exon2	wtf10exon4	5.53
wtf9exon3	wtf10exon4	5.96
wtf9exon4	wtf10exon4	2.7
wtf9exon5	wtf10exon4	0
wtf9exon6	wtf10exon4	3.42
wtf10exon1	wtf10exon4	9.29
wtf10exon2	wtf10exon4	5.53
wtf10exon3	wtf10exon4	5.71
wtf10exon4	wtf10exon4	100
wtf10exon5	wtf10exon4	0
wtf11exon1	wtf10exon4	12.1
wtf11exon2	wtf10exon4	4.88
wtf11exon3	wtf10exon4	5.24
wtf11exon4	wtf10exon4	58.49
wtf11exon5	wtf10exon4	0
wtf12exon1	wtf10exon4	9.29
wtf12exon2	wtf10exon4	4.76
wtf12exon3	wtf10exon4	4.86
wtf12exon4	wtf10exon4	14.21
wtf13exon1	wtf10exon4	7.86
wtf13exon2	wtf10exon4	5.86
wtf13exon3	wtf10exon4	4.76
wtf13exon4	wtf10exon4	3.15
wtf13exon5	wtf10exon4	0
wtf13exon6	wtf10exon4	12.24
wtf14exon1	wtf10exon4	5.15
wtf14exon2	wtf10exon4	4.96
wtf14exon3	wtf10exon4	5.15
wtf14exon4	wtf10exon4	0
wtf14exon5	wtf10exon4	0
wtf15exon1	wtf10exon4	7.86
wtf15exon2	wtf10exon4	4.07
wtf15exon3	wtf10exon4	5.14
wtf15exon4	wtf10exon4	41.38
wtf15exon5	wtf10exon4	0
wtf16exon1	wtf10exon4	7.86
wtf16exon2	wtf10exon4	5.14
wtf16exon3	wtf10exon4	4.64
wtf16exon4	wtf10exon4	3.15
wtf16exon5	wtf10exon4	0
wtf16exon6	wtf10exon4	9.17
wtf17exon1	wtf10exon4	7.86
wtf17exon2	wtf10exon4	5.53
wtf17exon3	wtf10exon4	4.08
wtf17exon4	wtf10exon4	38.89
wtf17exon5	wtf10exon4	0
wtf18exon1	wtf10exon4	8.57
wtf18exon2	wtf10exon4	5.13
wtf18exon3	wtf10exon4	5.17
wtf18exon4	wtf10exon4	3.15
wtf18exon5	wtf10exon4	0
wtf18exon6	wtf10exon4	13.95
wtf19exon1	wtf10exon4	7.86
wtf19exon2	wtf10exon4	3.86
wtf19exon3	wtf10exon4	4.95
wtf19exon4	wtf10exon4	2.7
wtf19exon5	wtf10exon4	0
wtf19exon6	wtf10exon4	0.85
wtf20exon1	wtf10exon4	8.57
wtf20exon2	wtf10exon4	5.13
wtf20exon3	wtf10exon4	5.18
wtf20exon4	wtf10exon4	40.74
wtf20exon5	wtf10exon4	0
wtf21exon1	wtf10exon4	8.57
wtf21exon2	wtf10exon4	5.14
wtf21exon3	wtf10exon4	4.81
wtf21exon4	wtf10exon4	2.7
wtf21exon5	wtf10exon4	0
wtf21exon6	wtf10exon4	9.4
wtf22exon1	wtf10exon4	8.63
wtf22exon2	wtf10exon4	5.47
wtf22exon3	wtf10exon4	6.67
wtf22exon4	wtf10exon4	3.45
wtf22exon5	wtf10exon4	0
wtf22exon6	wtf10exon4	8.55
wtf23exon1	wtf10exon4	7.86
wtf23exon2	wtf10exon4	3.86
wtf23exon3	wtf10exon4	6.67
wtf23exon4	wtf10exon4	2.7
wtf23exon5	wtf10exon4	0
wtf23exon6	wtf10exon4	9.17
wtf24exon1	wtf10exon4	8.57
wtf24exon2	wtf10exon4	5.47
wtf24exon3	wtf10exon4	5.71
wtf24exon4	wtf10exon4	3.15
wtf24exon5	wtf10exon4	0
wtf24exon6	wtf10exon4	0.85
wtf25exon1	wtf10exon4	8.57
wtf25exon2	wtf10exon4	5.93
wtf25exon3	wtf10exon4	4.78
wtf25exon4	wtf10exon4	38.89
wtf25exon5	wtf10exon4	0
wtf1exon1	wtf10exon5	18.42
wtf1exon2	wtf10exon5	8.49
wtf1exon3	wtf10exon5	11.49
wtf1exon4	wtf10exon5	0
wtf1exon5	wtf10exon5	87.01
wtf2exon1	wtf10exon5	19.08
wtf2exon2	wtf10exon5	0.98
wtf2exon3	wtf10exon5	94.81
wtf3exon1	wtf10exon5	19.74
wtf3exon2	wtf10exon5	8.88
wtf3exon3	wtf10exon5	11.79
wtf3exon4	wtf10exon5	0
wtf3exon5	wtf10exon5	85.71
wtf4exon1	wtf10exon5	16.11
wtf4exon2	wtf10exon5	5.26
wtf4exon3	wtf10exon5	8.25
wtf4exon4	wtf10exon5	9.95
wtf4exon5	wtf10exon5	0.74
wtf4exon6	wtf10exon5	25.66
wtf5exon1	wtf10exon5	19.08
wtf5exon2	wtf10exon5	8.88
wtf5exon3	wtf10exon5	9.68
wtf5exon4	wtf10exon5	0
wtf5exon5	wtf10exon5	93.51
wtf6exon1	wtf10exon5	19.61
wtf6exon2	wtf10exon5	8.88
wtf6exon3	wtf10exon5	9.65
wtf6exon4	wtf10exon5	0
wtf6exon5	wtf10exon5	77.92
wtf7exon1	wtf10exon5	15.79
wtf7exon2	wtf10exon5	4.17
wtf7exon3	wtf10exon5	8.24
wtf8exon1	wtf10exon5	16.45
wtf8exon2	wtf10exon5	8.49
wtf8exon3	wtf10exon5	7.79
wtf8exon4	wtf10exon5	10.45
wtf8exon5	wtf10exon5	0.74
wtf8exon6	wtf10exon5	44.94
wtf9exon1	wtf10exon5	18.42
wtf9exon2	wtf10exon5	8.88
wtf9exon3	wtf10exon5	7.17
wtf9exon4	wtf10exon5	9.95
wtf9exon5	wtf10exon5	0.74
wtf9exon6	wtf10exon5	44.94
wtf10exon1	wtf10exon5	17.76
wtf10exon2	wtf10exon5	8.88
wtf10exon3	wtf10exon5	10.11
wtf10exon4	wtf10exon5	0
wtf10exon5	wtf10exon5	100
wtf11exon1	wtf10exon5	15.43
wtf11exon2	wtf10exon5	4.5
wtf11exon3	wtf10exon5	12.77
wtf11exon4	wtf10exon5	0
wtf11exon5	wtf10exon5	6.06
wtf12exon1	wtf10exon5	19.74
wtf12exon2	wtf10exon5	7.02
wtf12exon3	wtf10exon5	11.64
wtf12exon4	wtf10exon5	33.33
wtf13exon1	wtf10exon5	16.11
wtf13exon2	wtf10exon5	5.26
wtf13exon3	wtf10exon5	6.72
wtf13exon4	wtf10exon5	9.95
wtf13exon5	wtf10exon5	0.74
wtf13exon6	wtf10exon5	25.66
wtf14exon1	wtf10exon5	15.38
wtf14exon2	wtf10exon5	7.5
wtf14exon3	wtf10exon5	8.08
wtf14exon4	wtf10exon5	0
wtf14exon5	wtf10exon5	4.4
wtf15exon1	wtf10exon5	17.11
wtf15exon2	wtf10exon5	8.73
wtf15exon3	wtf10exon5	8.2
wtf15exon4	wtf10exon5	5.65
wtf15exon5	wtf10exon5	50.65
wtf16exon1	wtf10exon5	16.45
wtf16exon2	wtf10exon5	8.49
wtf16exon3	wtf10exon5	9.86
wtf16exon4	wtf10exon5	9.95
wtf16exon5	wtf10exon5	0.74
wtf16exon6	wtf10exon5	33.63
wtf17exon1	wtf10exon5	19.08
wtf17exon2	wtf10exon5	8.11
wtf17exon3	wtf10exon5	14.16
wtf17exon4	wtf10exon5	0
wtf17exon5	wtf10exon5	89.61
wtf18exon1	wtf10exon5	15.79
wtf18exon2	wtf10exon5	5.26
wtf18exon3	wtf10exon5	7.41
wtf18exon4	wtf10exon5	9.95
wtf18exon5	wtf10exon5	0.74
wtf18exon6	wtf10exon5	28.36
wtf19exon1	wtf10exon5	16.11
wtf19exon2	wtf10exon5	6.14
wtf19exon3	wtf10exon5	5.56
wtf19exon4	wtf10exon5	11.94
wtf19exon5	wtf10exon5	0
wtf19exon6	wtf10exon5	42.7
wtf20exon1	wtf10exon5	16.45
wtf20exon2	wtf10exon5	5.26
wtf20exon3	wtf10exon5	13.87
wtf20exon4	wtf10exon5	0
wtf20exon5	wtf10exon5	76.62
wtf21exon1	wtf10exon5	18.42
wtf21exon2	wtf10exon5	7.72
wtf21exon3	wtf10exon5	9.76
wtf21exon4	wtf10exon5	11.44
wtf21exon5	wtf10exon5	0
wtf21exon6	wtf10exon5	35.45
wtf22exon1	wtf10exon5	17.76
wtf22exon2	wtf10exon5	8.05
wtf22exon3	wtf10exon5	8.96
wtf22exon4	wtf10exon5	8.79
wtf22exon5	wtf10exon5	0
wtf22exon6	wtf10exon5	35.45
wtf23exon1	wtf10exon5	16.11
wtf23exon2	wtf10exon5	6.14
wtf23exon3	wtf10exon5	7.53
wtf23exon4	wtf10exon5	11.94
wtf23exon5	wtf10exon5	0
wtf23exon6	wtf10exon5	30.97
wtf24exon1	wtf10exon5	17.11
wtf24exon2	wtf10exon5	8.43
wtf24exon3	wtf10exon5	9.38
wtf24exon4	wtf10exon5	9.95
wtf24exon5	wtf10exon5	0
wtf24exon6	wtf10exon5	43.82
wtf25exon1	wtf10exon5	17.76
wtf25exon2	wtf10exon5	8.88
wtf25exon3	wtf10exon5	13.45
wtf25exon4	wtf10exon5	0
wtf25exon5	wtf10exon5	83.12
wtf1exon1	wtf11exon1	61.15
wtf1exon2	wtf11exon1	14.64
wtf1exon3	wtf11exon1	19.54
wtf1exon4	wtf11exon1	15.29
wtf1exon5	wtf11exon1	14.81
wtf2exon1	wtf11exon1	59.87
wtf2exon2	wtf11exon1	2.37
wtf2exon3	wtf11exon1	14.2
wtf3exon1	wtf11exon1	61.15
wtf3exon2	wtf11exon1	14.64
wtf3exon3	wtf11exon1	20.7
wtf3exon4	wtf11exon1	11.46
wtf3exon5	wtf11exon1	16.05
wtf4exon1	wtf11exon1	54.78
wtf4exon2	wtf11exon1	14.14
wtf4exon3	wtf11exon1	18.79
wtf4exon4	wtf11exon1	12.7
wtf4exon5	wtf11exon1	2.43
wtf4exon6	wtf11exon1	25.14
wtf5exon1	wtf11exon1	59.87
wtf5exon2	wtf11exon1	14.64
wtf5exon3	wtf11exon1	20.06
wtf5exon4	wtf11exon1	12.1
wtf5exon5	wtf11exon1	14.2
wtf6exon1	wtf11exon1	60.76
wtf6exon2	wtf11exon1	14.64
wtf6exon3	wtf11exon1	20
wtf6exon4	wtf11exon1	12.1
wtf6exon5	wtf11exon1	12.96
wtf7exon1	wtf11exon1	46.25
wtf7exon2	wtf11exon1	8.5
wtf7exon3	wtf11exon1	10.75
wtf8exon1	wtf11exon1	63.06
wtf8exon2	wtf11exon1	14.64
wtf8exon3	wtf11exon1	16.79
wtf8exon4	wtf11exon1	12.7
wtf8exon5	wtf11exon1	2.43
wtf8exon6	wtf11exon1	22.29
wtf9exon1	wtf11exon1	61.78
wtf9exon2	wtf11exon1	15.36
wtf9exon3	wtf11exon1	19.23
wtf9exon4	wtf11exon1	12.7
wtf9exon5	wtf11exon1	2.43
wtf9exon6	wtf11exon1	22.29
wtf10exon1	wtf11exon1	61.15
wtf10exon2	wtf11exon1	14.64
wtf10exon3	wtf11exon1	21.63
wtf10exon4	wtf11exon1	12.1
wtf10exon5	wtf11exon1	15.43
wtf11exon1	wtf11exon1	100
wtf11exon2	wtf11exon1	12.22
wtf11exon3	wtf11exon1	18.01
wtf11exon4	wtf11exon1	12.1
wtf11exon5	wtf11exon1	2.25
wtf12exon1	wtf11exon1	64.33
wtf12exon2	wtf11exon1	11.45
wtf12exon3	wtf11exon1	16.92
wtf12exon4	wtf11exon1	19.81
wtf13exon1	wtf11exon1	54.78
wtf13exon2	wtf11exon1	13.8
wtf13exon3	wtf11exon1	15.92
wtf13exon4	wtf11exon1	12.7
wtf13exon5	wtf11exon1	2.43
wtf13exon6	wtf11exon1	25.14
wtf14exon1	wtf11exon1	34.81
wtf14exon2	wtf11exon1	12.09
wtf14exon3	wtf11exon1	17.48
wtf14exon4	wtf11exon1	0.97
wtf14exon5	wtf11exon1	1.17
wtf15exon1	wtf11exon1	61.15
wtf15exon2	wtf11exon1	13.04
wtf15exon3	wtf11exon1	15.73
wtf15exon4	wtf11exon1	12.1
wtf15exon5	wtf11exon1	18.52
wtf16exon1	wtf11exon1	61.78
wtf16exon2	wtf11exon1	14.64
wtf16exon3	wtf11exon1	14.46
wtf16exon4	wtf11exon1	12.3
wtf16exon5	wtf11exon1	2.43
wtf16exon6	wtf11exon1	29.3
wtf17exon1	wtf11exon1	59.87
wtf17exon2	wtf11exon1	15
wtf17exon3	wtf11exon1	15.83
wtf17exon4	wtf11exon1	15.29
wtf17exon5	wtf11exon1	16.05
wtf18exon1	wtf11exon1	62.42
wtf18exon2	wtf11exon1	12.46
wtf18exon3	wtf11exon1	16.97
wtf18exon4	wtf11exon1	12.7
wtf18exon5	wtf11exon1	2.43
wtf18exon6	wtf11exon1	30.25
wtf19exon1	wtf11exon1	54.78
wtf19exon2	wtf11exon1	11.36
wtf19exon3	wtf11exon1	14.03
wtf19exon4	wtf11exon1	14.68
wtf19exon5	wtf11exon1	4.37
wtf19exon6	wtf11exon1	18.47
wtf20exon1	wtf11exon1	63.69
wtf20exon2	wtf11exon1	12.46
wtf20exon3	wtf11exon1	17.42
wtf20exon4	wtf11exon1	15.92
wtf20exon5	wtf11exon1	12.96
wtf21exon1	wtf11exon1	61.78
wtf21exon2	wtf11exon1	14.64
wtf21exon3	wtf11exon1	13.48
wtf21exon4	wtf11exon1	14.68
wtf21exon5	wtf11exon1	4.37
wtf21exon6	wtf11exon1	26.11
wtf22exon1	wtf11exon1	61.78
wtf22exon2	wtf11exon1	13.88
wtf22exon3	wtf11exon1	19.23
wtf22exon4	wtf11exon1	12.88
wtf22exon5	wtf11exon1	3.88
wtf22exon6	wtf11exon1	26.75
wtf23exon1	wtf11exon1	54.14
wtf23exon2	wtf11exon1	11.36
wtf23exon3	wtf11exon1	18.88
wtf23exon4	wtf11exon1	14.68
wtf23exon5	wtf11exon1	3.88
wtf23exon6	wtf11exon1	26.11
wtf24exon1	wtf11exon1	65.61
wtf24exon2	wtf11exon1	13.88
wtf24exon3	wtf11exon1	14.51
wtf24exon4	wtf11exon1	13.1
wtf24exon5	wtf11exon1	4.37
wtf24exon6	wtf11exon1	18.47
wtf25exon1	wtf11exon1	61.15
wtf25exon2	wtf11exon1	15
wtf25exon3	wtf11exon1	17.8
wtf25exon4	wtf11exon1	15.29
wtf25exon5	wtf11exon1	14.81
wtf1exon1	wtf11exon2	9.38
wtf1exon2	wtf11exon2	32.73
wtf1exon3	wtf11exon2	23.05
wtf1exon4	wtf11exon2	5.18
wtf1exon5	wtf11exon2	4.8
wtf2exon1	wtf11exon2	9.38
wtf2exon2	wtf11exon2	2.46
wtf2exon3	wtf11exon2	4.5
wtf3exon1	wtf11exon2	8.81
wtf3exon2	wtf11exon2	33.63
wtf3exon3	wtf11exon2	24.26
wtf3exon4	wtf11exon2	3.96
wtf3exon5	wtf11exon2	5.41
wtf4exon1	wtf11exon2	6.82
wtf4exon2	wtf11exon2	21.61
wtf4exon3	wtf11exon2	16.91
wtf4exon4	wtf11exon2	16.81
wtf4exon5	wtf11exon2	5.12
wtf4exon6	wtf11exon2	9.92
wtf5exon1	wtf11exon2	9.38
wtf5exon2	wtf11exon2	33.33
wtf5exon3	wtf11exon2	23.38
wtf5exon4	wtf11exon2	4.88
wtf5exon5	wtf11exon2	4.5
wtf6exon1	wtf11exon2	9.07
wtf6exon2	wtf11exon2	33.63
wtf6exon3	wtf11exon2	23.38
wtf6exon4	wtf11exon2	4.88
wtf6exon5	wtf11exon2	6.01
wtf7exon1	wtf11exon2	9.38
wtf7exon2	wtf11exon2	36.53
wtf7exon3	wtf11exon2	9.88
wtf8exon1	wtf11exon2	9.94
wtf8exon2	wtf11exon2	32.13
wtf8exon3	wtf11exon2	16.45
wtf8exon4	wtf11exon2	17.68
wtf8exon5	wtf11exon2	5.42
wtf8exon6	wtf11exon2	6.31
wtf9exon1	wtf11exon2	9.09
wtf9exon2	wtf11exon2	33.63
wtf9exon3	wtf11exon2	18.64
wtf9exon4	wtf11exon2	17.1
wtf9exon5	wtf11exon2	5.42
wtf9exon6	wtf11exon2	6.31
wtf10exon1	wtf11exon2	9.09
wtf10exon2	wtf11exon2	33.63
wtf10exon3	wtf11exon2	24.93
wtf10exon4	wtf11exon2	4.88
wtf10exon5	wtf11exon2	4.5
wtf11exon1	wtf11exon2	12.22
wtf11exon2	wtf11exon2	100
wtf11exon3	wtf11exon2	20.46
wtf11exon4	wtf11exon2	4.88
wtf11exon5	wtf11exon2	5.92
wtf12exon1	wtf11exon2	8.81
wtf12exon2	wtf11exon2	23.27
wtf12exon3	wtf11exon2	21.61
wtf12exon4	wtf11exon2	8.97
wtf13exon1	wtf11exon2	6.82
wtf13exon2	wtf11exon2	21.33
wtf13exon3	wtf11exon2	14.71
wtf13exon4	wtf11exon2	16.81
wtf13exon5	wtf11exon2	5.12
wtf13exon6	wtf11exon2	9.92
wtf14exon1	wtf11exon2	8.52
wtf14exon2	wtf11exon2	26.73
wtf14exon3	wtf11exon2	22.44
wtf14exon4	wtf11exon2	5.72
wtf14exon5	wtf11exon2	2.17
wtf15exon1	wtf11exon2	8.81
wtf15exon2	wtf11exon2	23.88
wtf15exon3	wtf11exon2	22.82
wtf15exon4	wtf11exon2	5.11
wtf15exon5	wtf11exon2	5.71
wtf16exon1	wtf11exon2	9.94
wtf16exon2	wtf11exon2	33.03
wtf16exon3	wtf11exon2	15.93
wtf16exon4	wtf11exon2	16.81
wtf16exon5	wtf11exon2	5.42
wtf16exon6	wtf11exon2	7.42
wtf17exon1	wtf11exon2	9.09
wtf17exon2	wtf11exon2	33.93
wtf17exon3	wtf11exon2	21.2
wtf17exon4	wtf11exon2	5.79
wtf17exon5	wtf11exon2	4.5
wtf18exon1	wtf11exon2	10.23
wtf18exon2	wtf11exon2	21.61
wtf18exon3	wtf11exon2	15.65
wtf18exon4	wtf11exon2	16.81
wtf18exon5	wtf11exon2	5.42
wtf18exon6	wtf11exon2	9.62
wtf19exon1	wtf11exon2	6.82
wtf19exon2	wtf11exon2	43.03
wtf19exon3	wtf11exon2	15.79
wtf19exon4	wtf11exon2	19.71
wtf19exon5	wtf11exon2	5.42
wtf19exon6	wtf11exon2	6.01
wtf20exon1	wtf11exon2	9.94
wtf20exon2	wtf11exon2	21.88
wtf20exon3	wtf11exon2	22.35
wtf20exon4	wtf11exon2	5.18
wtf20exon5	wtf11exon2	5.71
wtf21exon1	wtf11exon2	9.09
wtf21exon2	wtf11exon2	31.83
wtf21exon3	wtf11exon2	18.28
wtf21exon4	wtf11exon2	19.13
wtf21exon5	wtf11exon2	5.42
wtf21exon6	wtf11exon2	7.42
wtf22exon1	wtf11exon2	8.81
wtf22exon2	wtf11exon2	31.53
wtf22exon3	wtf11exon2	17.13
wtf22exon4	wtf11exon2	16.52
wtf22exon5	wtf11exon2	5.72
wtf22exon6	wtf11exon2	8.01
wtf23exon1	wtf11exon2	6.82
wtf23exon2	wtf11exon2	43.03
wtf23exon3	wtf11exon2	19.65
wtf23exon4	wtf11exon2	19.71
wtf23exon5	wtf11exon2	5.12
wtf23exon6	wtf11exon2	8.01
wtf24exon1	wtf11exon2	9.38
wtf24exon2	wtf11exon2	32.13
wtf24exon3	wtf11exon2	15.24
wtf24exon4	wtf11exon2	17.39
wtf24exon5	wtf11exon2	5.72
wtf24exon6	wtf11exon2	6.31
wtf25exon1	wtf11exon2	9.09
wtf25exon2	wtf11exon2	33.33
wtf25exon3	wtf11exon2	22.06
wtf25exon4	wtf11exon2	5.79
wtf25exon5	wtf11exon2	4.5
wtf1exon1	wtf11exon3	14.56
wtf1exon2	wtf11exon3	29.78
wtf1exon3	wtf11exon3	67.53
wtf1exon4	wtf11exon3	6.05
wtf1exon5	wtf11exon3	11.91
wtf2exon1	wtf11exon3	13.03
wtf2exon2	wtf11exon3	3.88
wtf2exon3	wtf11exon3	11.91
wtf3exon1	wtf11exon3	13.03
wtf3exon2	wtf11exon3	30.51
wtf3exon3	wtf11exon3	51.09
wtf3exon4	wtf11exon3	5.24
wtf3exon5	wtf11exon3	12.77
wtf4exon1	wtf11exon3	12.64
wtf4exon2	wtf11exon3	26.48
wtf4exon3	wtf11exon3	28.57
wtf4exon4	wtf11exon3	39.39
wtf4exon5	wtf11exon3	5.67
wtf4exon6	wtf11exon3	11.76
wtf5exon1	wtf11exon3	13.03
wtf5exon2	wtf11exon3	29.78
wtf5exon3	wtf11exon3	51.96
wtf5exon4	wtf11exon3	5.24
wtf5exon5	wtf11exon3	11.91
wtf6exon1	wtf11exon3	12.98
wtf6exon2	wtf11exon3	30.51
wtf6exon3	wtf11exon3	51.79
wtf6exon4	wtf11exon3	5.24
wtf6exon5	wtf11exon3	11.91
wtf7exon1	wtf11exon3	13.69
wtf7exon2	wtf11exon3	19.27
wtf7exon3	wtf11exon3	21.63
wtf8exon1	wtf11exon3	13.79
wtf8exon2	wtf11exon3	29.41
wtf8exon3	wtf11exon3	28.52
wtf8exon4	wtf11exon3	39.83
wtf8exon5	wtf11exon3	6.07
wtf8exon6	wtf11exon3	10.3
wtf9exon1	wtf11exon3	14.18
wtf9exon2	wtf11exon3	30.51
wtf9exon3	wtf11exon3	28.71
wtf9exon4	wtf11exon3	38.53
wtf9exon5	wtf11exon3	6.07
wtf9exon6	wtf11exon3	10.3
wtf10exon1	wtf11exon3	13.79
wtf10exon2	wtf11exon3	30.51
wtf10exon3	wtf11exon3	58.97
wtf10exon4	wtf11exon3	5.24
wtf10exon5	wtf11exon3	12.77
wtf11exon1	wtf11exon3	18.01
wtf11exon2	wtf11exon3	20.46
wtf11exon3	wtf11exon3	100
wtf11exon4	wtf11exon3	6.45
wtf11exon5	wtf11exon3	5.17
wtf12exon1	wtf11exon3	14.94
wtf12exon2	wtf11exon3	27.53
wtf12exon3	wtf11exon3	60.61
wtf12exon4	wtf11exon3	13
wtf13exon1	wtf11exon3	12.64
wtf13exon2	wtf11exon3	26.13
wtf13exon3	wtf11exon3	23.71
wtf13exon4	wtf11exon3	39.39
wtf13exon5	wtf11exon3	5.67
wtf13exon6	wtf11exon3	11.76
wtf14exon1	wtf11exon3	11.45
wtf14exon2	wtf11exon3	26.18
wtf14exon3	wtf11exon3	38.02
wtf14exon4	wtf11exon3	6.88
wtf14exon5	wtf11exon3	1.22
wtf15exon1	wtf11exon3	13.79
wtf15exon2	wtf11exon3	27.37
wtf15exon3	wtf11exon3	45.87
wtf15exon4	wtf11exon3	5.24
wtf15exon5	wtf11exon3	9.79
wtf16exon1	wtf11exon3	12.64
wtf16exon2	wtf11exon3	29.04
wtf16exon3	wtf11exon3	32.94
wtf16exon4	wtf11exon3	38.53
wtf16exon5	wtf11exon3	6.07
wtf16exon6	wtf11exon3	10.44
wtf17exon1	wtf11exon3	12.26
wtf17exon2	wtf11exon3	29.04
wtf17exon3	wtf11exon3	55.56
wtf17exon4	wtf11exon3	4.44
wtf17exon5	wtf11exon3	12.34
wtf18exon1	wtf11exon3	13.79
wtf18exon2	wtf11exon3	25.78
wtf18exon3	wtf11exon3	25.92
wtf18exon4	wtf11exon3	39.39
wtf18exon5	wtf11exon3	6.07
wtf18exon6	wtf11exon3	12.7
wtf19exon1	wtf11exon3	12.64
wtf19exon2	wtf11exon3	25.65
wtf19exon3	wtf11exon3	22
wtf19exon4	wtf11exon3	36.8
wtf19exon5	wtf11exon3	6.88
wtf19exon6	wtf11exon3	8.58
wtf20exon1	wtf11exon3	13.41
wtf20exon2	wtf11exon3	25.78
wtf20exon3	wtf11exon3	58.97
wtf20exon4	wtf11exon3	5.24
wtf20exon5	wtf11exon3	11.91
wtf21exon1	wtf11exon3	14.18
wtf21exon2	wtf11exon3	29.41
wtf21exon3	wtf11exon3	28.87
wtf21exon4	wtf11exon3	37.23
wtf21exon5	wtf11exon3	6.88
wtf21exon6	wtf11exon3	10.04
wtf22exon1	wtf11exon3	14.18
wtf22exon2	wtf11exon3	30.77
wtf22exon3	wtf11exon3	30
wtf22exon4	wtf11exon3	29.87
wtf22exon5	wtf11exon3	6.48
wtf22exon6	wtf11exon3	10.04
wtf23exon1	wtf11exon3	12.64
wtf23exon2	wtf11exon3	25.65
wtf23exon3	wtf11exon3	29.03
wtf23exon4	wtf11exon3	36.8
wtf23exon5	wtf11exon3	6.48
wtf23exon6	wtf11exon3	8.84
wtf24exon1	wtf11exon3	14.18
wtf24exon2	wtf11exon3	30.4
wtf24exon3	wtf11exon3	32.44
wtf24exon4	wtf11exon3	38.1
wtf24exon5	wtf11exon3	6.88
wtf24exon6	wtf11exon3	9.01
wtf25exon1	wtf11exon3	13.41
wtf25exon2	wtf11exon3	30.15
wtf25exon3	wtf11exon3	58.12
wtf25exon4	wtf11exon3	4.44
wtf25exon5	wtf11exon3	11.06
wtf1exon1	wtf11exon4	10.88
wtf1exon2	wtf11exon4	4.74
wtf1exon3	wtf11exon4	6.45
wtf1exon4	wtf11exon4	51.85
wtf1exon5	wtf11exon4	0
wtf2exon1	wtf11exon4	10.2
wtf2exon2	wtf11exon4	8.96
wtf2exon3	wtf11exon4	0
wtf3exon1	wtf11exon4	9.52
wtf3exon2	wtf11exon4	4.74
wtf3exon3	wtf11exon4	6.71
wtf3exon4	wtf11exon4	50
wtf3exon5	wtf11exon4	0
wtf4exon1	wtf11exon4	9.52
wtf4exon2	wtf11exon4	6.23
wtf4exon3	wtf11exon4	7.41
wtf4exon4	wtf11exon4	2.58
wtf4exon5	wtf11exon4	0
wtf4exon6	wtf11exon4	13.64
wtf5exon1	wtf11exon4	10.2
wtf5exon2	wtf11exon4	5.14
wtf5exon3	wtf11exon4	6.39
wtf5exon4	wtf11exon4	58.49
wtf5exon5	wtf11exon4	0
wtf6exon1	wtf11exon4	10.14
wtf6exon2	wtf11exon4	4.74
wtf6exon3	wtf11exon4	6.37
wtf6exon4	wtf11exon4	58.49
wtf6exon5	wtf11exon4	0
wtf7exon1	wtf11exon4	7.48
wtf7exon2	wtf11exon4	3.46
wtf7exon3	wtf11exon4	8.7
wtf8exon1	wtf11exon4	10.2
wtf8exon2	wtf11exon4	4.35
wtf8exon3	wtf11exon4	5.62
wtf8exon4	wtf11exon4	2.15
wtf8exon5	wtf11exon4	0
wtf8exon6	wtf11exon4	4.84
wtf9exon1	wtf11exon4	10.2
wtf9exon2	wtf11exon4	5.14
wtf9exon3	wtf11exon4	7.02
wtf9exon4	wtf11exon4	2.15
wtf9exon5	wtf11exon4	0
wtf9exon6	wtf11exon4	4.84
wtf10exon1	wtf11exon4	10.88
wtf10exon2	wtf11exon4	4.74
wtf10exon3	wtf11exon4	7.14
wtf10exon4	wtf11exon4	58.49
wtf10exon5	wtf11exon4	0
wtf11exon1	wtf11exon4	12.1
wtf11exon2	wtf11exon4	4.88
wtf11exon3	wtf11exon4	6.45
wtf11exon4	wtf11exon4	100
wtf11exon5	wtf11exon4	0
wtf12exon1	wtf11exon4	10.88
wtf12exon2	wtf11exon4	5.49
wtf12exon3	wtf11exon4	6.88
wtf12exon4	wtf11exon4	13.11
wtf13exon1	wtf11exon4	9.52
wtf13exon2	wtf11exon4	6.23
wtf13exon3	wtf11exon4	6.16
wtf13exon4	wtf11exon4	2.58
wtf13exon5	wtf11exon4	0
wtf13exon6	wtf11exon4	13.64
wtf14exon1	wtf11exon4	6.12
wtf14exon2	wtf11exon4	3.72
wtf14exon3	wtf11exon4	4.78
wtf14exon4	wtf11exon4	0
wtf14exon5	wtf11exon4	0
wtf15exon1	wtf11exon4	8.84
wtf15exon2	wtf11exon4	4.44
wtf15exon3	wtf11exon4	7.91
wtf15exon4	wtf11exon4	42.19
wtf15exon5	wtf11exon4	0
wtf16exon1	wtf11exon4	9.52
wtf16exon2	wtf11exon4	4.74
wtf16exon3	wtf11exon4	5.49
wtf16exon4	wtf11exon4	2.58
wtf16exon5	wtf11exon4	0
wtf16exon6	wtf11exon4	11.81
wtf17exon1	wtf11exon4	9.52
wtf17exon2	wtf11exon4	4.74
wtf17exon3	wtf11exon4	6.91
wtf17exon4	wtf11exon4	53.7
wtf17exon5	wtf11exon4	0
wtf18exon1	wtf11exon4	10.2
wtf18exon2	wtf11exon4	5.49
wtf18exon3	wtf11exon4	6.69
wtf18exon4	wtf11exon4	2.58
wtf18exon5	wtf11exon4	0
wtf18exon6	wtf11exon4	15.44
wtf19exon1	wtf11exon4	9.52
wtf19exon2	wtf11exon4	3.26
wtf19exon3	wtf11exon4	5.47
wtf19exon4	wtf11exon4	2.15
wtf19exon5	wtf11exon4	0
wtf19exon6	wtf11exon4	4.03
wtf20exon1	wtf11exon4	10.2
wtf20exon2	wtf11exon4	5.49
wtf20exon3	wtf11exon4	6.77
wtf20exon4	wtf11exon4	53.7
wtf20exon5	wtf11exon4	0
wtf21exon1	wtf11exon4	10.2
wtf21exon2	wtf11exon4	4.74
wtf21exon3	wtf11exon4	5.19
wtf21exon4	wtf11exon4	2.15
wtf21exon5	wtf11exon4	0
wtf21exon6	wtf11exon4	11.29
wtf22exon1	wtf11exon4	10.27
wtf22exon2	wtf11exon4	5.08
wtf22exon3	wtf11exon4	7.37
wtf22exon4	wtf11exon4	2.8
wtf22exon5	wtf11exon4	0
wtf22exon6	wtf11exon4	11.29
wtf23exon1	wtf11exon4	9.52
wtf23exon2	wtf11exon4	3.26
wtf23exon3	wtf11exon4	7.37
wtf23exon4	wtf11exon4	2.15
wtf23exon5	wtf11exon4	0
wtf23exon6	wtf11exon4	11.02
wtf24exon1	wtf11exon4	10.2
wtf24exon2	wtf11exon4	5.08
wtf24exon3	wtf11exon4	6.53
wtf24exon4	wtf11exon4	2.58
wtf24exon5	wtf11exon4	0
wtf24exon6	wtf11exon4	4.03
wtf25exon1	wtf11exon4	10.2
wtf25exon2	wtf11exon4	5.14
wtf25exon3	wtf11exon4	6.37
wtf25exon4	wtf11exon4	53.7
wtf25exon5	wtf11exon4	0
wtf1exon1	wtf11exon5	3.75
wtf1exon2	wtf11exon5	6.5
wtf1exon3	wtf11exon5	6.9
wtf1exon4	wtf11exon5	0
wtf1exon5	wtf11exon5	6.06
wtf2exon1	wtf11exon5	4.38
wtf2exon2	wtf11exon5	0
wtf2exon3	wtf11exon5	5.05
wtf3exon1	wtf11exon5	4.38
wtf3exon2	wtf11exon5	7.32
wtf3exon3	wtf11exon5	6.16
wtf3exon4	wtf11exon5	0
wtf3exon5	wtf11exon5	7.07
wtf4exon1	wtf11exon5	3.18
wtf4exon2	wtf11exon5	3.66
wtf4exon3	wtf11exon5	2.32
wtf4exon4	wtf11exon5	6.74
wtf4exon5	wtf11exon5	1.05
wtf4exon6	wtf11exon5	2.98
wtf5exon1	wtf11exon5	4.38
wtf5exon2	wtf11exon5	7.32
wtf5exon3	wtf11exon5	5.54
wtf5exon4	wtf11exon5	0
wtf5exon5	wtf11exon5	5.05
wtf6exon1	wtf11exon5	4.35
wtf6exon2	wtf11exon5	7.32
wtf6exon3	wtf11exon5	5.52
wtf6exon4	wtf11exon5	0
wtf6exon5	wtf11exon5	7.07
wtf7exon1	wtf11exon5	4.35
wtf7exon2	wtf11exon5	2.69
wtf7exon3	wtf11exon5	0.59
wtf8exon1	wtf11exon5	3.75
wtf8exon2	wtf11exon5	6.91
wtf8exon3	wtf11exon5	2.75
wtf8exon4	wtf11exon5	5.7
wtf8exon5	wtf11exon5	1.05
wtf8exon6	wtf11exon5	3.81
wtf9exon1	wtf11exon5	3.75
wtf9exon2	wtf11exon5	7.72
wtf9exon3	wtf11exon5	2.76
wtf9exon4	wtf11exon5	6.22
wtf9exon5	wtf11exon5	1.05
wtf9exon6	wtf11exon5	3.81
wtf10exon1	wtf11exon5	4.38
wtf10exon2	wtf11exon5	7.32
wtf10exon3	wtf11exon5	6.2
wtf10exon4	wtf11exon5	0
wtf10exon5	wtf11exon5	6.06
wtf11exon1	wtf11exon5	2.25
wtf11exon2	wtf11exon5	5.92
wtf11exon3	wtf11exon5	5.17
wtf11exon4	wtf11exon5	0
wtf11exon5	wtf11exon5	100
wtf12exon1	wtf11exon5	4.38
wtf12exon2	wtf11exon5	3.66
wtf12exon3	wtf11exon5	8.3
wtf12exon4	wtf11exon5	2.93
wtf13exon1	wtf11exon5	3.18
wtf13exon2	wtf11exon5	3.66
wtf13exon3	wtf11exon5	1.9
wtf13exon4	wtf11exon5	6.74
wtf13exon5	wtf11exon5	1.05
wtf13exon6	wtf11exon5	2.98
wtf14exon1	wtf11exon5	3.97
wtf14exon2	wtf11exon5	4.18
wtf14exon3	wtf11exon5	5.95
wtf14exon4	wtf11exon5	1.05
wtf14exon5	wtf11exon5	0
wtf15exon1	wtf11exon5	3.12
wtf15exon2	wtf11exon5	5.81
wtf15exon3	wtf11exon5	6.72
wtf15exon4	wtf11exon5	0
wtf15exon5	wtf11exon5	7.07
wtf16exon1	wtf11exon5	3.75
wtf16exon2	wtf11exon5	6.91
wtf16exon3	wtf11exon5	2.68
wtf16exon4	wtf11exon5	6.74
wtf16exon5	wtf11exon5	1.05
wtf16exon6	wtf11exon5	3.1
wtf17exon1	wtf11exon5	4.38
wtf17exon2	wtf11exon5	6.5
wtf17exon3	wtf11exon5	7.66
wtf17exon4	wtf11exon5	0
wtf17exon5	wtf11exon5	7.07
wtf18exon1	wtf11exon5	3.75
wtf18exon2	wtf11exon5	3.66
wtf18exon3	wtf11exon5	2.09
wtf18exon4	wtf11exon5	6.74
wtf18exon5	wtf11exon5	1.05
wtf18exon6	wtf11exon5	2.67
wtf19exon1	wtf11exon5	3.18
wtf19exon2	wtf11exon5	4.55
wtf19exon3	wtf11exon5	2.31
wtf19exon4	wtf11exon5	8.81
wtf19exon5	wtf11exon5	1.05
wtf19exon6	wtf11exon5	3.81
wtf20exon1	wtf11exon5	3.75
wtf20exon2	wtf11exon5	3.66
wtf20exon3	wtf11exon5	7.26
wtf20exon4	wtf11exon5	0
wtf20exon5	wtf11exon5	7.07
wtf21exon1	wtf11exon5	3.75
wtf21exon2	wtf11exon5	6.5
wtf21exon3	wtf11exon5	3.11
wtf21exon4	wtf11exon5	8.29
wtf21exon5	wtf11exon5	1.05
wtf21exon6	wtf11exon5	4.76
wtf22exon1	wtf11exon5	3.77
wtf22exon2	wtf11exon5	6.02
wtf22exon3	wtf11exon5	2.41
wtf22exon4	wtf11exon5	9.77
wtf22exon5	wtf11exon5	1.05
wtf22exon6	wtf11exon5	3.97
wtf23exon1	wtf11exon5	3.18
wtf23exon2	wtf11exon5	4.55
wtf23exon3	wtf11exon5	3.1
wtf23exon4	wtf11exon5	8.81
wtf23exon5	wtf11exon5	1.05
wtf23exon6	wtf11exon5	3.88
wtf24exon1	wtf11exon5	3.12
wtf24exon2	wtf11exon5	6.02
wtf24exon3	wtf11exon5	2.98
wtf24exon4	wtf11exon5	6.22
wtf24exon5	wtf11exon5	1.05
wtf24exon6	wtf11exon5	4.76
wtf25exon1	wtf11exon5	3.12
wtf25exon2	wtf11exon5	7.32
wtf25exon3	wtf11exon5	6.84
wtf25exon4	wtf11exon5	0
wtf25exon5	wtf11exon5	6.06
wtf1exon1	wtf12exon1	89.21
wtf1exon2	wtf12exon1	12.23
wtf1exon3	wtf12exon1	17.62
wtf1exon4	wtf12exon1	11.56
wtf1exon5	wtf12exon1	18.42
wtf2exon1	wtf12exon1	89.21
wtf2exon2	wtf12exon1	3.31
wtf2exon3	wtf12exon1	18.42
wtf3exon1	wtf12exon1	90.65
wtf3exon2	wtf12exon1	10.79
wtf3exon3	wtf12exon1	16.84
wtf3exon4	wtf12exon1	10.2
wtf3exon5	wtf12exon1	18.42
wtf4exon1	wtf12exon1	70.5
wtf4exon2	wtf12exon1	15.49
wtf4exon3	wtf12exon1	16.44
wtf4exon4	wtf12exon1	12.13
wtf4exon5	wtf12exon1	3.19
wtf4exon6	wtf12exon1	24.42
wtf5exon1	wtf12exon1	89.21
wtf5exon2	wtf12exon1	10.07
wtf5exon3	wtf12exon1	18.47
wtf5exon4	wtf12exon1	9.29
wtf5exon5	wtf12exon1	18.42
wtf6exon1	wtf12exon1	90
wtf6exon2	wtf12exon1	10.79
wtf6exon3	wtf12exon1	18.41
wtf6exon4	wtf12exon1	9.29
wtf6exon5	wtf12exon1	15.13
wtf7exon1	wtf12exon1	57.75
wtf7exon2	wtf12exon1	6.75
wtf7exon3	wtf12exon1	12.14
wtf8exon1	wtf12exon1	87.77
wtf8exon2	wtf12exon1	10.07
wtf8exon3	wtf12exon1	15.67
wtf8exon4	wtf12exon1	11.72
wtf8exon5	wtf12exon1	3.19
wtf8exon6	wtf12exon1	21.23
wtf9exon1	wtf12exon1	89.93
wtf9exon2	wtf12exon1	10.07
wtf9exon3	wtf12exon1	18.18
wtf9exon4	wtf12exon1	11.72
wtf9exon5	wtf12exon1	3.19
wtf9exon6	wtf12exon1	21.23
wtf10exon1	wtf12exon1	85.61
wtf10exon2	wtf12exon1	10.79
wtf10exon3	wtf12exon1	20.21
wtf10exon4	wtf12exon1	9.29
wtf10exon5	wtf12exon1	19.74
wtf11exon1	wtf12exon1	64.33
wtf11exon2	wtf12exon1	8.81
wtf11exon3	wtf12exon1	14.94
wtf11exon4	wtf12exon1	10.88
wtf11exon5	wtf12exon1	4.38
wtf12exon1	wtf12exon1	100
wtf12exon2	wtf12exon1	13.47
wtf12exon3	wtf12exon1	16.92
wtf12exon4	wtf12exon1	17.92
wtf13exon1	wtf12exon1	70.5
wtf13exon2	wtf12exon1	15.82
wtf13exon3	wtf12exon1	13.97
wtf13exon4	wtf12exon1	12.13
wtf13exon5	wtf12exon1	3.19
wtf13exon6	wtf12exon1	24.42
wtf14exon1	wtf12exon1	47.14
wtf14exon2	wtf12exon1	8.89
wtf14exon3	wtf12exon1	11.89
wtf14exon4	wtf12exon1	2.13
wtf14exon5	wtf12exon1	1.31
wtf15exon1	wtf12exon1	76.98
wtf15exon2	wtf12exon1	12.71
wtf15exon3	wtf12exon1	12.41
wtf15exon4	wtf12exon1	10
wtf15exon5	wtf12exon1	16.45
wtf16exon1	wtf12exon1	86.33
wtf16exon2	wtf12exon1	12.23
wtf16exon3	wtf12exon1	13.25
wtf16exon4	wtf12exon1	11.72
wtf16exon5	wtf12exon1	3.19
wtf16exon6	wtf12exon1	28.77
wtf17exon1	wtf12exon1	87.77
wtf17exon2	wtf12exon1	11.51
wtf17exon3	wtf12exon1	13.9
wtf17exon4	wtf12exon1	10.88
wtf17exon5	wtf12exon1	19.74
wtf18exon1	wtf12exon1	87.77
wtf18exon2	wtf12exon1	13.8
wtf18exon3	wtf12exon1	14.85
wtf18exon4	wtf12exon1	12.13
wtf18exon5	wtf12exon1	3.19
wtf18exon6	wtf12exon1	30.46
wtf19exon1	wtf12exon1	71.94
wtf19exon2	wtf12exon1	9.7
wtf19exon3	wtf12exon1	14.03
wtf19exon4	wtf12exon1	12.97
wtf19exon5	wtf12exon1	4.26
wtf19exon6	wtf12exon1	19.18
wtf20exon1	wtf12exon1	87.77
wtf20exon2	wtf12exon1	14.14
wtf20exon3	wtf12exon1	14.77
wtf20exon4	wtf12exon1	12.93
wtf20exon5	wtf12exon1	15.13
wtf21exon1	wtf12exon1	89.93
wtf21exon2	wtf12exon1	12.23
wtf21exon3	wtf12exon1	14.54
wtf21exon4	wtf12exon1	12.13
wtf21exon5	wtf12exon1	4.26
wtf21exon6	wtf12exon1	24.66
wtf22exon1	wtf12exon1	89.93
wtf22exon2	wtf12exon1	11.03
wtf22exon3	wtf12exon1	17.83
wtf22exon4	wtf12exon1	9.55
wtf22exon5	wtf12exon1	3.72
wtf22exon6	wtf12exon1	26.03
wtf23exon1	wtf12exon1	71.22
wtf23exon2	wtf12exon1	9.7
wtf23exon3	wtf12exon1	18.88
wtf23exon4	wtf12exon1	12.97
wtf23exon5	wtf12exon1	3.72
wtf23exon6	wtf12exon1	24.66
wtf24exon1	wtf12exon1	92.09
wtf24exon2	wtf12exon1	11.03
wtf24exon3	wtf12exon1	13.33
wtf24exon4	wtf12exon1	11.3
wtf24exon5	wtf12exon1	4.26
wtf24exon6	wtf12exon1	19.86
wtf25exon1	wtf12exon1	88.49
wtf25exon2	wtf12exon1	10.43
wtf25exon3	wtf12exon1	15.91
wtf25exon4	wtf12exon1	10.88
wtf25exon5	wtf12exon1	17.76
wtf1exon1	wtf12exon2	13.8
wtf1exon2	wtf12exon2	29.83
wtf1exon3	wtf12exon2	28.57
wtf1exon4	wtf12exon2	5.86
wtf1exon5	wtf12exon2	6.67
wtf2exon1	wtf12exon2	13.47
wtf2exon2	wtf12exon2	3.25
wtf2exon3	wtf12exon2	7.02
wtf3exon1	wtf12exon2	13.8
wtf3exon2	wtf12exon2	29.83
wtf3exon3	wtf12exon2	28.12
wtf3exon4	wtf12exon2	6.59
wtf3exon5	wtf12exon2	7.37
wtf4exon1	wtf12exon2	10.77
wtf4exon2	wtf12exon2	84.98
wtf4exon3	wtf12exon2	21.22
wtf4exon4	wtf12exon2	20.21
wtf4exon5	wtf12exon2	6.05
wtf4exon6	wtf12exon2	13
wtf5exon1	wtf12exon2	13.47
wtf5exon2	wtf12exon2	29.49
wtf5exon3	wtf12exon2	25.58
wtf5exon4	wtf12exon2	4.76
wtf5exon5	wtf12exon2	7.02
wtf6exon1	wtf12exon2	13.47
wtf6exon2	wtf12exon2	29.83
wtf6exon3	wtf12exon2	25.51
wtf6exon4	wtf12exon2	4.76
wtf6exon5	wtf12exon2	6.67
wtf7exon1	wtf12exon2	11.78
wtf7exon2	wtf12exon2	25.44
wtf7exon3	wtf12exon2	16.49
wtf8exon1	wtf12exon2	12.79
wtf8exon2	wtf12exon2	27.8
wtf8exon3	wtf12exon2	21
wtf8exon4	wtf12exon2	20.21
wtf8exon5	wtf12exon2	6.05
wtf8exon6	wtf12exon2	7.37
wtf9exon1	wtf12exon2	13.47
wtf9exon2	wtf12exon2	29.15
wtf9exon3	wtf12exon2	23.72
wtf9exon4	wtf12exon2	20.56
wtf9exon5	wtf12exon2	6.05
wtf9exon6	wtf12exon2	7.37
wtf10exon1	wtf12exon2	12.79
wtf10exon2	wtf12exon2	29.83
wtf10exon3	wtf12exon2	27.65
wtf10exon4	wtf12exon2	4.76
wtf10exon5	wtf12exon2	7.02
wtf11exon1	wtf12exon2	11.45
wtf11exon2	wtf12exon2	23.27
wtf11exon3	wtf12exon2	27.53
wtf11exon4	wtf12exon2	5.49
wtf11exon5	wtf12exon2	3.66
wtf12exon1	wtf12exon2	13.47
wtf12exon2	wtf12exon2	100
wtf12exon3	wtf12exon2	27.18
wtf12exon4	wtf12exon2	10.57
wtf13exon1	wtf12exon2	10.77
wtf13exon2	wtf12exon2	85.35
wtf13exon3	wtf12exon2	18.56
wtf13exon4	wtf12exon2	20.21
wtf13exon5	wtf12exon2	6.05
wtf13exon6	wtf12exon2	13
wtf14exon1	wtf12exon2	9.76
wtf14exon2	wtf12exon2	23.57
wtf14exon3	wtf12exon2	21.52
wtf14exon4	wtf12exon2	8.54
wtf14exon5	wtf12exon2	1.79
wtf15exon1	wtf12exon2	9.76
wtf15exon2	wtf12exon2	48.92
wtf15exon3	wtf12exon2	27.61
wtf15exon4	wtf12exon2	5.4
wtf15exon5	wtf12exon2	5.96
wtf16exon1	wtf12exon2	11.78
wtf16exon2	wtf12exon2	30.51
wtf16exon3	wtf12exon2	25.43
wtf16exon4	wtf12exon2	20.21
wtf16exon5	wtf12exon2	6.05
wtf16exon6	wtf12exon2	12.28
wtf17exon1	wtf12exon2	13.8
wtf17exon2	wtf12exon2	30.17
wtf17exon3	wtf12exon2	25.95
wtf17exon4	wtf12exon2	5.49
wtf17exon5	wtf12exon2	7.02
wtf18exon1	wtf12exon2	12.79
wtf18exon2	wtf12exon2	87.91
wtf18exon3	wtf12exon2	19.41
wtf18exon4	wtf12exon2	20.21
wtf18exon5	wtf12exon2	6.05
wtf18exon6	wtf12exon2	13.89
wtf19exon1	wtf12exon2	11.11
wtf19exon2	wtf12exon2	27.15
wtf19exon3	wtf12exon2	16.94
wtf19exon4	wtf12exon2	18.82
wtf19exon5	wtf12exon2	6.41
wtf19exon6	wtf12exon2	8.77
wtf20exon1	wtf12exon2	12.46
wtf20exon2	wtf12exon2	88.28
wtf20exon3	wtf12exon2	28.72
wtf20exon4	wtf12exon2	6.96
wtf20exon5	wtf12exon2	6.32
wtf21exon1	wtf12exon2	13.47
wtf21exon2	wtf12exon2	30.51
wtf21exon3	wtf12exon2	20.81
wtf21exon4	wtf12exon2	19.16
wtf21exon5	wtf12exon2	6.41
wtf21exon6	wtf12exon2	11.58
wtf22exon1	wtf12exon2	13.13
wtf22exon2	wtf12exon2	31.53
wtf22exon3	wtf12exon2	21.92
wtf22exon4	wtf12exon2	17.42
wtf22exon5	wtf12exon2	7.47
wtf22exon6	wtf12exon2	11.58
wtf23exon1	wtf12exon2	11.11
wtf23exon2	wtf12exon2	27.15
wtf23exon3	wtf12exon2	21.62
wtf23exon4	wtf12exon2	18.82
wtf23exon5	wtf12exon2	6.41
wtf23exon6	wtf12exon2	12.63
wtf24exon1	wtf12exon2	12.79
wtf24exon2	wtf12exon2	30.51
wtf24exon3	wtf12exon2	25.59
wtf24exon4	wtf12exon2	21.6
wtf24exon5	wtf12exon2	6.05
wtf24exon6	wtf12exon2	8.42
wtf25exon1	wtf12exon2	14.14
wtf25exon2	wtf12exon2	29.83
wtf25exon3	wtf12exon2	27.68
wtf25exon4	wtf12exon2	5.49
wtf25exon5	wtf12exon2	7.72
wtf1exon1	wtf12exon3	16.92
wtf1exon2	wtf12exon3	29.41
wtf1exon3	wtf12exon3	80.52
wtf1exon4	wtf12exon3	7.29
wtf1exon5	wtf12exon3	11.64
wtf2exon1	wtf12exon3	15.38
wtf2exon2	wtf12exon3	3.93
wtf2exon3	wtf12exon3	10.78
wtf3exon1	wtf12exon3	15.77
wtf3exon2	wtf12exon3	29.04
wtf3exon3	wtf12exon3	48.91
wtf3exon4	wtf12exon3	5.26
wtf3exon5	wtf12exon3	13.36
wtf4exon1	wtf12exon3	15.38
wtf4exon2	wtf12exon3	27.53
wtf4exon3	wtf12exon3	26.71
wtf4exon4	wtf12exon3	30.57
wtf4exon5	wtf12exon3	6.94
wtf4exon6	wtf12exon3	11.81
wtf5exon1	wtf12exon3	15.38
wtf5exon2	wtf12exon3	29.41
wtf5exon3	wtf12exon3	61.44
wtf5exon4	wtf12exon3	4.86
wtf5exon5	wtf12exon3	10.78
wtf6exon1	wtf12exon3	16.09
wtf6exon2	wtf12exon3	29.04
wtf6exon3	wtf12exon3	60.91
wtf6exon4	wtf12exon3	4.86
wtf6exon5	wtf12exon3	13.36
wtf7exon1	wtf12exon3	14.89
wtf7exon2	wtf12exon3	17.97
wtf7exon3	wtf12exon3	19.59
wtf8exon1	wtf12exon3	16.92
wtf8exon2	wtf12exon3	27.94
wtf8exon3	wtf12exon3	29.58
wtf8exon4	wtf12exon3	29.26
wtf8exon5	wtf12exon3	6.53
wtf8exon6	wtf12exon3	11.21
wtf9exon1	wtf12exon3	16.54
wtf9exon2	wtf12exon3	29.78
wtf9exon3	wtf12exon3	29.35
wtf9exon4	wtf12exon3	28.82
wtf9exon5	wtf12exon3	6.53
wtf9exon6	wtf12exon3	11.21
wtf10exon1	wtf12exon3	16.92
wtf10exon2	wtf12exon3	29.04
wtf10exon3	wtf12exon3	66.3
wtf10exon4	wtf12exon3	4.86
wtf10exon5	wtf12exon3	11.64
wtf11exon1	wtf12exon3	16.92
wtf11exon2	wtf12exon3	21.61
wtf11exon3	wtf12exon3	60.61
wtf11exon4	wtf12exon3	6.88
wtf11exon5	wtf12exon3	8.3
wtf12exon1	wtf12exon3	16.92
wtf12exon2	wtf12exon3	27.18
wtf12exon3	wtf12exon3	100
wtf12exon4	wtf12exon3	14.72
wtf13exon1	wtf12exon3	15.38
wtf13exon2	wtf12exon3	27.87
wtf13exon3	wtf12exon3	22.16
wtf13exon4	wtf12exon3	30.57
wtf13exon5	wtf12exon3	6.94
wtf13exon6	wtf12exon3	11.81
wtf14exon1	wtf12exon3	14.29
wtf14exon2	wtf12exon3	23.64
wtf14exon3	wtf12exon3	39.92
wtf14exon4	wtf12exon3	7.35
wtf14exon5	wtf12exon3	1.23
wtf15exon1	wtf12exon3	13.85
wtf15exon2	wtf12exon3	29.2
wtf15exon3	wtf12exon3	49.17
wtf15exon4	wtf12exon3	4.86
wtf15exon5	wtf12exon3	12.5
wtf16exon1	wtf12exon3	15.77
wtf16exon2	wtf12exon3	28.68
wtf16exon3	wtf12exon3	34.52
wtf16exon4	wtf12exon3	29.69
wtf16exon5	wtf12exon3	6.53
wtf16exon6	wtf12exon3	11.29
wtf17exon1	wtf12exon3	15
wtf17exon2	wtf12exon3	28.68
wtf17exon3	wtf12exon3	55.6
wtf17exon4	wtf12exon3	5.67
wtf17exon5	wtf12exon3	12.93
wtf18exon1	wtf12exon3	16.92
wtf18exon2	wtf12exon3	26.48
wtf18exon3	wtf12exon3	24.23
wtf18exon4	wtf12exon3	30.57
wtf18exon5	wtf12exon3	6.53
wtf18exon6	wtf12exon3	13.94
wtf19exon1	wtf12exon3	15.38
wtf19exon2	wtf12exon3	24.78
wtf19exon3	wtf12exon3	19.32
wtf19exon4	wtf12exon3	34.06
wtf19exon5	wtf12exon3	6.12
wtf19exon6	wtf12exon3	9.91
wtf20exon1	wtf12exon3	16.54
wtf20exon2	wtf12exon3	26.48
wtf20exon3	wtf12exon3	57.26
wtf20exon4	wtf12exon3	5.26
wtf20exon5	wtf12exon3	13.36
wtf21exon1	wtf12exon3	16.54
wtf21exon2	wtf12exon3	29.41
wtf21exon3	wtf12exon3	25.35
wtf21exon4	wtf12exon3	33.62
wtf21exon5	wtf12exon3	6.12
wtf21exon6	wtf12exon3	10.89
wtf22exon1	wtf12exon3	16.54
wtf22exon2	wtf12exon3	30.4
wtf22exon3	wtf12exon3	27.42
wtf22exon4	wtf12exon3	27.51
wtf22exon5	wtf12exon3	6.53
wtf22exon6	wtf12exon3	10.48
wtf23exon1	wtf12exon3	15.38
wtf23exon2	wtf12exon3	24.78
wtf23exon3	wtf12exon3	25.48
wtf23exon4	wtf12exon3	34.06
wtf23exon5	wtf12exon3	5.71
wtf23exon6	wtf12exon3	10.08
wtf24exon1	wtf12exon3	16.92
wtf24exon2	wtf12exon3	29.67
wtf24exon3	wtf12exon3	32.82
wtf24exon4	wtf12exon3	28.82
wtf24exon5	wtf12exon3	6.53
wtf24exon6	wtf12exon3	10.34
wtf25exon1	wtf12exon3	16.15
wtf25exon2	wtf12exon3	29.41
wtf25exon3	wtf12exon3	58.12
wtf25exon4	wtf12exon3	5.67
wtf25exon5	wtf12exon3	11.21
wtf1exon1	wtf12exon4	18.4
wtf1exon2	wtf12exon4	14.78
wtf1exon3	wtf12exon4	13
wtf1exon4	wtf12exon4	25.14
wtf1exon5	wtf12exon4	34.43
wtf2exon1	wtf12exon4	18.4
wtf2exon2	wtf12exon4	4.62
wtf2exon3	wtf12exon4	33.33
wtf3exon1	wtf12exon4	17.92
wtf3exon2	wtf12exon4	15.09
wtf3exon3	wtf12exon4	14.03
wtf3exon4	wtf12exon4	13.66
wtf3exon5	wtf12exon4	34.43
wtf4exon1	wtf12exon4	15.57
wtf4exon2	wtf12exon4	10.57
wtf4exon3	wtf12exon4	13.57
wtf4exon4	wtf12exon4	7.46
wtf4exon5	wtf12exon4	0.41
wtf4exon6	wtf12exon4	28.17
wtf5exon1	wtf12exon4	18.4
wtf5exon2	wtf12exon4	14.78
wtf5exon3	wtf12exon4	12.88
wtf5exon4	wtf12exon4	14.21
wtf5exon5	wtf12exon4	32.79
wtf6exon1	wtf12exon4	18.31
wtf6exon2	wtf12exon4	15.09
wtf6exon3	wtf12exon4	12.84
wtf6exon4	wtf12exon4	14.21
wtf6exon5	wtf12exon4	34.97
wtf7exon1	wtf12exon4	15.09
wtf7exon2	wtf12exon4	8.56
wtf7exon3	wtf12exon4	11.37
wtf8exon1	wtf12exon4	17.45
wtf8exon2	wtf12exon4	14.15
wtf8exon3	wtf12exon4	10.36
wtf8exon4	wtf12exon4	7.46
wtf8exon5	wtf12exon4	0.41
wtf8exon6	wtf12exon4	25.14
wtf9exon1	wtf12exon4	17.92
wtf9exon2	wtf12exon4	14.47
wtf9exon3	wtf12exon4	12.54
wtf9exon4	wtf12exon4	7.12
wtf9exon5	wtf12exon4	0.41
wtf9exon6	wtf12exon4	25.14
wtf10exon1	wtf12exon4	18.4
wtf10exon2	wtf12exon4	15.09
wtf10exon3	wtf12exon4	13.25
wtf10exon4	wtf12exon4	14.21
wtf10exon5	wtf12exon4	33.33
wtf11exon1	wtf12exon4	19.81
wtf11exon2	wtf12exon4	8.97
wtf11exon3	wtf12exon4	13
wtf11exon4	wtf12exon4	13.11
wtf11exon5	wtf12exon4	2.93
wtf12exon1	wtf12exon4	17.92
wtf12exon2	wtf12exon4	10.57
wtf12exon3	wtf12exon4	14.72
wtf12exon4	wtf12exon4	100
wtf13exon1	wtf12exon4	15.57
wtf13exon2	wtf12exon4	10.57
wtf13exon3	wtf12exon4	12.28
wtf13exon4	wtf12exon4	7.46
wtf13exon5	wtf12exon4	0.41
wtf13exon6	wtf12exon4	28.17
wtf14exon1	wtf12exon4	14.08
wtf14exon2	wtf12exon4	10.36
wtf14exon3	wtf12exon4	12
wtf14exon4	wtf12exon4	0
wtf14exon5	wtf12exon4	2.03
wtf15exon1	wtf12exon4	17.92
wtf15exon2	wtf12exon4	11.71
wtf15exon3	wtf12exon4	12.58
wtf15exon4	wtf12exon4	14.21
wtf15exon5	wtf12exon4	21.31
wtf16exon1	wtf12exon4	16.98
wtf16exon2	wtf12exon4	14.78
wtf16exon3	wtf12exon4	13.26
wtf16exon4	wtf12exon4	7.46
wtf16exon5	wtf12exon4	0.41
wtf16exon6	wtf12exon4	26.34
wtf17exon1	wtf12exon4	17.92
wtf17exon2	wtf12exon4	14.15
wtf17exon3	wtf12exon4	13.76
wtf17exon4	wtf12exon4	17.49
wtf17exon5	wtf12exon4	34.43
wtf18exon1	wtf12exon4	16.04
wtf18exon2	wtf12exon4	9.97
wtf18exon3	wtf12exon4	12.4
wtf18exon4	wtf12exon4	7.46
wtf18exon5	wtf12exon4	0.41
wtf18exon6	wtf12exon4	28.72
wtf19exon1	wtf12exon4	15.57
wtf19exon2	wtf12exon4	10.53
wtf19exon3	wtf12exon4	9.86
wtf19exon4	wtf12exon4	10.51
wtf19exon5	wtf12exon4	0
wtf19exon6	wtf12exon4	24.04
wtf20exon1	wtf12exon4	16.51
wtf20exon2	wtf12exon4	9.97
wtf20exon3	wtf12exon4	14.52
wtf20exon4	wtf12exon4	18.03
wtf20exon5	wtf12exon4	35.52
wtf21exon1	wtf12exon4	17.92
wtf21exon2	wtf12exon4	14.15
wtf21exon3	wtf12exon4	11.54
wtf21exon4	wtf12exon4	10.17
wtf21exon5	wtf12exon4	0
wtf21exon6	wtf12exon4	30.05
wtf22exon1	wtf12exon4	17.92
wtf22exon2	wtf12exon4	13.21
wtf22exon3	wtf12exon4	13.76
wtf22exon4	wtf12exon4	9.06
wtf22exon5	wtf12exon4	0
wtf22exon6	wtf12exon4	27.87
wtf23exon1	wtf12exon4	15.57
wtf23exon2	wtf12exon4	10.53
wtf23exon3	wtf12exon4	12.84
wtf23exon4	wtf12exon4	10.51
wtf23exon5	wtf12exon4	0
wtf23exon6	wtf12exon4	26.88
wtf24exon1	wtf12exon4	17.92
wtf24exon2	wtf12exon4	12.89
wtf24exon3	wtf12exon4	12.89
wtf24exon4	wtf12exon4	7.46
wtf24exon5	wtf12exon4	0
wtf24exon6	wtf12exon4	24.59
wtf25exon1	wtf12exon4	17.45
wtf25exon2	wtf12exon4	14.78
wtf25exon3	wtf12exon4	14.19
wtf25exon4	wtf12exon4	17.49
wtf25exon5	wtf12exon4	33.88
wtf1exon1	wtf13exon1	69.06
wtf1exon2	wtf13exon1	12.23
wtf1exon3	wtf13exon1	16.09
wtf1exon4	wtf13exon1	9.52
wtf1exon5	wtf13exon1	14.77
wtf2exon1	wtf13exon1	71.22
wtf2exon2	wtf13exon1	3.38
wtf2exon3	wtf13exon1	14.77
wtf3exon1	wtf13exon1	73.38
wtf3exon2	wtf13exon1	12.23
wtf3exon3	wtf13exon1	13.33
wtf3exon4	wtf13exon1	12.93
wtf3exon5	wtf13exon1	15.44
wtf4exon1	wtf13exon1	100
wtf4exon2	wtf13exon1	12.46
wtf4exon3	wtf13exon1	15.1
wtf4exon4	wtf13exon1	12.71
wtf4exon5	wtf13exon1	3.78
wtf4exon6	wtf13exon1	23.84
wtf5exon1	wtf13exon1	71.22
wtf5exon2	wtf13exon1	12.59
wtf5exon3	wtf13exon1	15.61
wtf5exon4	wtf13exon1	7.86
wtf5exon5	wtf13exon1	14.77
wtf6exon1	wtf13exon1	73.57
wtf6exon2	wtf13exon1	12.23
wtf6exon3	wtf13exon1	15.56
wtf6exon4	wtf13exon1	7.86
wtf6exon5	wtf13exon1	13.42
wtf7exon1	wtf13exon1	62.68
wtf7exon2	wtf13exon1	6.75
wtf7exon3	wtf13exon1	12.62
wtf8exon1	wtf13exon1	70.5
wtf8exon2	wtf13exon1	11.87
wtf8exon3	wtf13exon1	14.93
wtf8exon4	wtf13exon1	12.29
wtf8exon5	wtf13exon1	3.78
wtf8exon6	wtf13exon1	19.86
wtf9exon1	wtf13exon1	69.78
wtf9exon2	wtf13exon1	11.87
wtf9exon3	wtf13exon1	15.73
wtf9exon4	wtf13exon1	12.29
wtf9exon5	wtf13exon1	3.78
wtf9exon6	wtf13exon1	19.86
wtf10exon1	wtf13exon1	68.35
wtf10exon2	wtf13exon1	12.23
wtf10exon3	wtf13exon1	17.73
wtf10exon4	wtf13exon1	7.86
wtf10exon5	wtf13exon1	16.11
wtf11exon1	wtf13exon1	54.78
wtf11exon2	wtf13exon1	6.82
wtf11exon3	wtf13exon1	12.64
wtf11exon4	wtf13exon1	9.52
wtf11exon5	wtf13exon1	3.18
wtf12exon1	wtf13exon1	70.5
wtf12exon2	wtf13exon1	10.77
wtf12exon3	wtf13exon1	15.38
wtf12exon4	wtf13exon1	15.57
wtf13exon1	wtf13exon1	100
wtf13exon2	wtf13exon1	12.79
wtf13exon3	wtf13exon1	13.41
wtf13exon4	wtf13exon1	12.71
wtf13exon5	wtf13exon1	3.78
wtf13exon6	wtf13exon1	23.84
wtf14exon1	wtf13exon1	51.09
wtf14exon2	wtf13exon1	10
wtf14exon3	wtf13exon1	12.94
wtf14exon4	wtf13exon1	2.16
wtf14exon5	wtf13exon1	1.33
wtf15exon1	wtf13exon1	63.31
wtf15exon2	wtf13exon1	11.37
wtf15exon3	wtf13exon1	12.03
wtf15exon4	wtf13exon1	10.71
wtf15exon5	wtf13exon1	16.78
wtf16exon1	wtf13exon1	68.35
wtf16exon2	wtf13exon1	12.23
wtf16exon3	wtf13exon1	14.06
wtf16exon4	wtf13exon1	12.29
wtf16exon5	wtf13exon1	3.78
wtf16exon6	wtf13exon1	23.97
wtf17exon1	wtf13exon1	71.22
wtf17exon2	wtf13exon1	12.59
wtf17exon3	wtf13exon1	12.11
wtf17exon4	wtf13exon1	12.93
wtf17exon5	wtf13exon1	15.44
wtf18exon1	wtf13exon1	70.5
wtf18exon2	wtf13exon1	11.45
wtf18exon3	wtf13exon1	13.64
wtf18exon4	wtf13exon1	12.71
wtf18exon5	wtf13exon1	3.78
wtf18exon6	wtf13exon1	29.14
wtf19exon1	wtf13exon1	98.53
wtf19exon2	wtf13exon1	8.86
wtf19exon3	wtf13exon1	11.17
wtf19exon4	wtf13exon1	13.56
wtf19exon5	wtf13exon1	4.86
wtf19exon6	wtf13exon1	17.81
wtf20exon1	wtf13exon1	70.5
wtf20exon2	wtf13exon1	11.78
wtf20exon3	wtf13exon1	12.5
wtf20exon4	wtf13exon1	13.61
wtf20exon5	wtf13exon1	13.42
wtf21exon1	wtf13exon1	69.78
wtf21exon2	wtf13exon1	12.23
wtf21exon3	wtf13exon1	11.7
wtf21exon4	wtf13exon1	14.41
wtf21exon5	wtf13exon1	4.86
wtf21exon6	wtf13exon1	23.97
wtf22exon1	wtf13exon1	69.78
wtf22exon2	wtf13exon1	11.03
wtf22exon3	wtf13exon1	15.38
wtf22exon4	wtf13exon1	11.52
wtf22exon5	wtf13exon1	4.32
wtf22exon6	wtf13exon1	21.92
wtf23exon1	wtf13exon1	97.79
wtf23exon2	wtf13exon1	8.86
wtf23exon3	wtf13exon1	15.03
wtf23exon4	wtf13exon1	13.56
wtf23exon5	wtf13exon1	4.32
wtf23exon6	wtf13exon1	23.97
wtf24exon1	wtf13exon1	70.5
wtf24exon2	wtf13exon1	11.03
wtf24exon3	wtf13exon1	12.94
wtf24exon4	wtf13exon1	11.86
wtf24exon5	wtf13exon1	4.86
wtf24exon6	wtf13exon1	18.49
wtf25exon1	wtf13exon1	68.35
wtf25exon2	wtf13exon1	12.95
wtf25exon3	wtf13exon1	12.88
wtf25exon4	wtf13exon1	12.93
wtf25exon5	wtf13exon1	14.77
wtf1exon1	wtf13exon2	16.16
wtf1exon2	wtf13exon2	27.12
wtf1exon3	wtf13exon2	29.62
wtf1exon4	wtf13exon2	6.96
wtf1exon5	wtf13exon2	5.61
wtf2exon1	wtf13exon2	15.82
wtf2exon2	wtf13exon2	3.25
wtf2exon3	wtf13exon2	5.61
wtf3exon1	wtf13exon2	15.49
wtf3exon2	wtf13exon2	27.46
wtf3exon3	wtf13exon2	27.16
wtf3exon4	wtf13exon2	7.33
wtf3exon5	wtf13exon2	6.67
wtf4exon1	wtf13exon2	12.79
wtf4exon2	wtf13exon2	99.63
wtf4exon3	wtf13exon2	22.67
wtf4exon4	wtf13exon2	18.12
wtf4exon5	wtf13exon2	5.69
wtf4exon6	wtf13exon2	14
wtf5exon1	wtf13exon2	15.82
wtf5exon2	wtf13exon2	27.12
wtf5exon3	wtf13exon2	26.16
wtf5exon4	wtf13exon2	5.86
wtf5exon5	wtf13exon2	5.61
wtf6exon1	wtf13exon2	15.82
wtf6exon2	wtf13exon2	27.46
wtf6exon3	wtf13exon2	26.09
wtf6exon4	wtf13exon2	5.86
wtf6exon5	wtf13exon2	5.26
wtf7exon1	wtf13exon2	12.79
wtf7exon2	wtf13exon2	23.43
wtf7exon3	wtf13exon2	15.77
wtf8exon1	wtf13exon2	15.15
wtf8exon2	wtf13exon2	25.76
[truncated: 15,162 more rows]
