# Supplementary material for: Recombination shapes the diversification of the wtf meiotic drivers
Source: eLife. 2026 May 11;13:RP100638. doi: 10.7554/eLife.100638 (PMC13160552; doi:10.7554/eLife.100638)
Supplement: Figure 1—source data 3. [file elife-100638-fig1-data3.xlsx]

## Sheet: Fig1D
	ATG	LTR	pseudogenization
JB1180_unitig_19quiver_174386_175879	0	1	0
JB874_Segkk14arrow_668314_669809	0	1	0
JB760_Segkk36arrow_603404_604858	0	1	0
JB758_Segkk10arrow_526386_528035	1	1	0
JB4_Segkk8arrow_593215_594771	1	1	0
JB929_Segkk11arrow_2039681_2041237	1	1	0
JB758_Segkk14arrow_608995_610491	1	1	0
JB953_Segkk14arrow_245220_246716	1	1	0
JB840_Segkk21arrow_642027_643523	1	1	0
JB758_Segkk18arrow_1086679_1087781	-1	1	0
JB22_Segkk7arrow_488524_489579	-1	1	0
JB840_Segkk18arrow_474387_475442	-1	1	0
JB760_Segkk19arrow_489680_490735	-1	1	0
JB1180_unitig_16quiver_197269_198324	-1	1	0
wtf6_ref	-1	1	0
JB760_Segkk36arrow_679297_680415	-1	1	0
JB879_Segkk61arrow_55620_56738	-1	1	0
JB854_Segkk21arrow_262263_263378	-1	1	0
wtf2_ref	-1	1	0
JB869_Segkk5arrow_626143_626533	-1	1	0
JB879_Segkk62arrow_223098_223488	-1	1	0
JB837_Segkk11arrow_2202789_2203849	-1	1	0
JB1180_unitig_65quiver_433134_434139	-1	1	0
JB760_Segkk23arrow_284753_285895	-1	1	0
JB938_Segkk74arrow_263912_265054	-1	1	0
JB869_Segkk11arrow_1064537_1065679	-1	1	0
JB22_Segkk1arrow_1026313_1027455	-1	1	0
JB758_Segkk18arrow_1079840_1080982	-1	1	0
JB873_Segkk24arrow_37367_38556	-1	1	0
JB854_Segkk20arrow_1164368_1165557	-1	1	0
JB4_Segkk4arrow_1182731_1183920	-1	1	0
JB864_Segkk46arrow_836747_838092	-1	1	0
JB758_Segkk18arrow_389336_390715	-1	1	0
wtf22_ref	-1	1	0
JB879_Segkk78arrow_80608_81957	-1	1	0
JB938_Segkk52arrow_440434_441783	-1	1	0
JB760_Segkk36arrow_90157_91506	-1	1	0
JB840_Segkk15arrow_984132_985448	-1	1	0
JB864_Segkk51arrow_867360_868737	-1	1	0
JB864_Segkk69arrow_1139157_1140445	-1	1	0
JB22_Segkk1arrow_246297_247597	-1	1	0
JB869_Segkk11arrow_284754_286054	-1	1	0
DY39827_Segkk17arrow_984956_986310	-1	1	0
JB879_Segkk63arrow_158149_159678	-1	1	0
JB864_Segkk51arrow_558664_560176	-1	1	0
JB1180_unitig_67quiver_482395_483641	0	-1	0
JB1180_unitig_9quiver_196637_198086	1	-1	0
DY39827_Segkk15arrow_469339_471009	1	-1	0
JB874_Segkk13arrow_375312_376982	1	-1	0
JB953_Segkk8arrow_208711_210380	1	-1	0
JB1206_Segkk17arrow_259077_260179	-1	-1	0
JB1180_unitig_66quiver_476950_478052	-1	-1	0
JB929_Segkk33arrow_1050740_1051843	-1	-1	0
JB4_Segkk5arrow_1074373_1075475	-1	-1	0
JB873_Segkk55arrow_634136_635238	-1	-1	0
JB953_Segkk14arrow_897151_898253	-1	-1	0
JB869_Segkk11arrow_1832099_1833177	-1	-1	0
JB953_Segkk13arrow_855406_856449	-1	-1	0
JB873_Segkk0arrow_10735_11645	-1	-1	0
DY34373_Segkk14arrow_1038621_1039763	-1	-1	0
JB1206_Segkk5arrow_1081070_1082220	-1	-1	0
JB1180_unitig_66quiver_472818_473959	-1	-1	0
JB873_Segkk55arrow_632213_633354	-1	-1	0
JB929_Segkk33arrow_1046608_1047750	-1	-1	0
JB4_Segkk5arrow_1070240_1071382	-1	-1	0
JB953_Segkk14arrow_895233_896375	-1	-1	0
JB1180_unitig_65quiver_262948_264007	-1	-1	0
DY34373_Segkk14arrow_362790_364105	-1	-1	0
JB1206_Segkk5arrow_405332_406647	-1	-1	0
JB1180_unitig_65quiver_377964_379310	-1	-1	0
JB1180_unitig_9quiver_194401_195730	-1	-1	0
JB22_Segkk6arrow_583737_585053	-1	-1	0
JB837_Segkk3arrow_586777_587905	0	1	1
JB4_Segkk5arrow_312667_313800	0	1	1
JB929_Segkk33arrow_280838_281971	0	1	1
JB873_Segkk39arrow_277495_278628	0	1	1
wtf13_ref	0	1	1
JB879_Segkk77arrow_111823_113393	0	1	1
JB837_Segkk11arrow_1861458_1863043	0	1	1
JB1206_Segkk1arrow_3802765_3804141	0	1	1
DY39827_Segkk20arrow_1146138_1147514	0	1	1
JB874_Segkk10arrow_1012116_1013521	0	1	1
JB1180_unitig_9quiver_134352_135837	0	1	1
JB874_Segkk12arrow_585790_587276	0	1	1
JB943_Segkk0arrow_619547_621099	0	1	1
JB953_Segkk13arrow_608071_609656	0	1	1
JB864_Segkk46arrow_390254_391822	0	1	1
JB840_Segkk22arrow_185273_186699	0	1	1
JB758_Segkk17arrow_182477_183903	0	1	1
JB1180_unitig_74quiver_101258_102683	0	1	1
JB854_Segkk21arrow_186363_187789	0	1	1
DY39827_Segkk17arrow_449766_451195	0	1	1
JB874_Segkk10arrow_463184_464612	0	1	1
wtf4_ref	0	1	1
JB1180_unitig_65quiver_411417_412890	1	1	1
JB953_Segkk1arrow_8082669_8083894	1	1	1
JB22_Segkk1arrow_409486_411057	1	1	1
JB869_Segkk11arrow_448071_449642	1	1	1
JB22_Segkk1arrow_281537_283034	1	1	1
JB869_Segkk11arrow_309999_321496	1	1	1
JB943_Segkk0arrow_679697_681158	1	1	1
DY39827_Segkk17arrow_764319_765742	1	1	1
JB1180_unitig_9quiver_4252_5711	1	1	1
JB929_Segkk35arrow_457458_458918	1	1	1
JB943_Segkk0arrow_479550_481010	1	1	1
JB953_Segkk13arrow_467892_469415	1	1	1
JB758_Segkk18arrow_415691_417164	1	1	1
DY39827_Segkk17arrow_608373_609891	1	1	1
JB840_Segkk15arrow_763094_764766	1	1	1
JB874_Segkk10arrow_778724_780396	1	1	1
JB864_Segkk51arrow_646575_648260	1	1	1
JB1180_unitig_65quiver_435046_436695	1	1	1
JB873_Segkk55arrow_1102_2753	1	1	1
JB929_Segkk33arrow_417975_419626	1	1	1
JB854_Segkk6arrow_423728_425376	1	1	1
JB837_Segkk11arrow_204843_206404	1	1	1
JB837_Segkk11arrow_1705309_1706968	1	1	1
JB943_Segkk8arrow_781460_782978	1	1	1
JB854_Segkk6arrow_399992_401543	1	1	1
JB953_Segkk14arrow_361156_362688	1	1	1
JB4_Segkk5arrow_393810_395395	1	1	1
JB873_Segkk6arrow_41909_43496	1	1	1
JB929_Segkk33arrow_361961_363548	1	1	1
DY34373_Segkk16arrow_282715_284312	1	1	1
JB1206_Segkk2arrow_108379_109976	1	1	1
JB1180_unitig_74quiver_179339_180948	1	1	1
JB943_Segkk8arrow_1020057_1021579	1	1	1
JB837_Segkk11arrow_2088936_2090557	1	1	1
JB938_Segkk74arrow_34904_35824	-1	1	1
JB869_Segkk11arrow_835972_836892	-1	1	1
JB760_Segkk23arrow_55743_56663	-1	1	1
JB22_Segkk1arrow_797318_798238	-1	1	1
JB4_Segkk5arrow_839558_840478	-1	1	1
JB873_Segkk55arrow_401953_402873	-1	1	1
JB854_Segkk6arrow_817849_818769	-1	1	1
JB929_Segkk33arrow_817895_818815	-1	1	1
JB1180_unitig_66quiver_242834_243754	-1	1	1
DY34373_Segkk14arrow_803588_804508	-1	1	1
JB758_Segkk18arrow_847904_848824	-1	1	1
JB938_Segkk74arrow_32320_33437	-1	1	1
JB760_Segkk23arrow_53159_54276	-1	1	1
JB1180_unitig_66quiver_240251_241368	-1	1	1
JB854_Segkk6arrow_815265_816382	-1	1	1
JB929_Segkk33arrow_815311_816428	-1	1	1
JB873_Segkk55arrow_399369_400486	-1	1	1
JB4_Segkk5arrow_836974_838091	-1	1	1
JB869_Segkk11arrow_833388_834505	-1	1	1
JB1206_Segkk5arrow_843828_844942	-1	1	1
JB953_Segkk14arrow_655872_656986	-1	1	1
JB938_Segkk74arrow_266108_267205	-1	1	1
JB760_Segkk23arrow_286949_288046	-1	1	1
JB869_Segkk11arrow_1066733_1067830	-1	1	1
JB873_Segkk58arrow_72655_73710	-1	1	1
JB929_Segkk36arrow_797191_798246	-1	1	1
JB864_Segkk25arrow_329957_331016	-1	1	1
DY39827_Segkk15arrow_467374_468431	-1	1	1
JB874_Segkk13arrow_373347_374404	-1	1	1
JB943_Segkk9arrow_1259983_1261040	-1	1	1
JB1180_unitig_19quiver_167517_168555	-1	1	1
JB929_Segkk25arrow_610325_611366	-1	1	1
JB943_Segkk29arrow_648956_649997	-1	1	1
JB873_Segkk34arrow_98215_99256	-1	1	1
JB938_Segkk74arrow_1031600_1032684	-1	1	1
JB22_Segkk6arrow_395830_396914	-1	1	1
JB840_Segkk22arrow_262300_263208	-1	1	1
JB758_Segkk17arrow_264546_265455	-1	1	1
JB953_Segkk14arrow_414292_415394	-1	1	1
DY39827_Segkk17arrow_1093062_1094123	-1	1	1
JB874_Segkk10arrow_1125393_1126457	-1	1	1
JB864_Segkk51arrow_975536_976619	-1	1	1
JB943_Segkk8arrow_1132188_1133271	-1	1	1
JB840_Segkk15arrow_1092978_1094061	-1	1	1
JB4_Segkk5arrow_441952_443003	-1	1	1
JB840_Segkk15arrow_670699_671746	-1	1	1
JB864_Segkk46arrow_258005_259055	-1	1	1
wtf25_ref	-1	1	1
JB938_Segkk52arrow_550392_551456	-1	1	1
JB760_Segkk36arrow_204496_205560	-1	1	1
JB879_Segkk78arrow_190656_191586	-1	1	1
DY39827_Segkk12arrow_582399_583456	-1	1	1
JB929_Segkk33arrow_415933_417068	-1	1	1
JB854_Segkk6arrow_421686_422821	-1	1	1
JB840_Segkk15arrow_444220_445284	-1	1	1
JB758_Segkk18arrow_442225_443330	-1	1	1
JB837_Segkk0arrow_532254_533405	-1	1	1
JB22_Segkk1arrow_407417_408573	-1	1	1
JB869_Segkk11arrow_446003_447159	-1	1	1
JB953_Segkk14arrow_392971_394124	-1	1	1
JB758_Segkk18arrow_308410_309551	-1	1	1
wtf3_ref	-1	1	1
JB873_Segkk0arrow_12521_13578	-1	1	1
DY34373_Segkk14arrow_281656_282987	-1	1	1
JB1206_Segkk5arrow_324209_325540	-1	1	1
JB953_Segkk14arrow_279975_281266	-1	1	1
DY39827_Segkk12arrow_452382_453709	-1	1	1
JB854_Segkk6arrow_373628_374956	-1	1	1
JB22_Segkk1arrow_362999_364327	-1	1	1
JB869_Segkk11arrow_401581_402909	-1	1	1
JB758_Segkk18arrow_275960_277254	-1	1	1
JB874_Segkk10arrow_617986_619329	-1	1	1
JB840_Segkk15arrow_604850_606193	-1	1	1
JB864_Segkk51arrow_490948_492292	-1	1	1
DY34373_Segkk14arrow_413343_414754	-1	1	1
JB1206_Segkk5arrow_455886_457297	-1	1	1
JB953_Segkk14arrow_416305_417817	-1	1	1
JB1180_unitig_65quiver_380219_381528	-1	1	1
JB1180_unitig_65quiver_296894_298243	-1	1	1
JB854_Segkk6arrow_292468_293819	-1	1	1
DY34373_Segkk17arrow_624940_626379	-1	1	1
JB4_Segkk5arrow_420373_421813	-1	1	1
JB873_Segkk6arrow_68507_69946	-1	1	1
JB929_Segkk33arrow_388560_390000	-1	1	1
DY34373_Segkk14arrow_365074_366371	-1	1	1
JB1206_Segkk5arrow_407616_408913	-1	1	1
JB22_Segkk6arrow_523993_525345	-1	1	1
JB938_Segkk74arrow_1159776_1161128	-1	1	1
wtf16_ref	-1	1	1
JB938_Segkk52arrow_70475_71785	-1	1	1
JB943_Segkk8arrow_620891_622201	-1	1	1
JB837_Segkk11arrow_283787_285178	-1	1	1
wtf18_ref	-1	1	1
JB760_Segkk27arrow_58631_60161	-1	1	1
JB938_Segkk52arrow_138282_139812	-1	1	1
JB874_Segkk10arrow_690636_692163	-1	1	1
JB943_Segkk8arrow_688569_690096	-1	1	1
DY39827_Segkk17arrow_676420_677986	-1	1	1
JB864_Segkk51arrow_330673_332197	-1	1	1
JB943_Segkk8arrow_455129_456413	-1	1	1
JB4_Segkk5arrow_443909_445364	-1	1	1
DY34373_Segkk16arrow_201278_202712	-1	1	1
JB1206_Segkk3arrow_227537_228971	-1	1	1
JB4_Segkk8arrow_465002_466523	-1	1	1
JB874_Segkk12arrow_453478_454692	0	-1	1
JB953_Segkk13arrow_465751_466965	0	-1	1
JB943_Segkk0arrow_477410_478624	0	-1	1
JB929_Segkk35arrow_455318_456532	0	-1	1
DY34373_Segkk14arrow_247532_248755	1	-1	1
JB1206_Segkk5arrow_290086_291309	1	-1	1
JB953_Segkk13arrow_668238_669680	1	-1	1
DY39827_Segkk12arrow_833885_835436	1	-1	1
JB874_Segkk12arrow_839833_841384	1	-1	1
JB929_Segkk11arrow_2293832_2295383	1	-1	1
JB953_Segkk13arrow_857367_858918	1	-1	1
JB4_Segkk8arrow_655589_657041	1	-1	1
JB929_Segkk11arrow_2102058_2103510	1	-1	1
JB874_Segkk12arrow_645864_647325	1	-1	1
JB874_Segkk12arrow_455618_457078	1	-1	1
DY39827_Segkk12arrow_644443_645934	1	-1	1
JB837_Segkk11arrow_1773438_1775045	1	-1	1
JB1206_Segkk5arrow_846128_846968	-1	-1	1
JB953_Segkk14arrow_658092_659012	-1	-1	1
JB22_Segkk1arrow_794734_795851	-1	-1	1
DY34373_Segkk14arrow_801368_802482	-1	-1	1
JB758_Segkk18arrow_845712_846826	-1	-1	1
JB953_Segkk8arrow_206746_207803	-1	-1	1
JB938_Segkk74arrow_1403345_1404459	-1	-1	1
JB22_Segkk6arrow_767353_768467	-1	-1	1
JB4_Segkk8arrow_842516_843630	-1	-1	1
JB869_Segkk6arrow_160051_161165	-1	-1	1
JB874_Segkk14arrow_666366_667404	-1	-1	1
JB840_Segkk21arrow_640079_641117	-1	-1	1
JB758_Segkk14arrow_607046_608084	-1	-1	1
DY39827_Segkk12arrow_831925_832970	-1	-1	1
JB4_Segkk8arrow_463177_464089	-1	-1	1
DY34373_Segkk14arrow_411779_412435	-1	-1	1
JB1206_Segkk5arrow_454322_454978	-1	-1	1
JB1180_unitig_74quiver_177336_178438	-1	-1	1
JB1206_Segkk2arrow_106365_107467	-1	-1	1
wtf17_ref	-1	-1	1
JB938_Segkk52arrow_136303_137352	-1	-1	1
DY39827_Segkk17arrow_674458_675508	-1	-1	1
JB864_Segkk51arrow_556711_557760	-1	-1	1
DY39827_Segkk12arrow_450420_451469	-1	-1	1
JB1180_unitig_67quiver_480426_481475	-1	-1	1
JB953_Segkk13arrow_463525_464575	-1	-1	1
JB929_Segkk35arrow_453092_454142	-1	-1	1
JB874_Segkk12arrow_451252_452302	-1	-1	1
JB943_Segkk0arrow_475184_476234	-1	-1	1
JB873_Segkk39arrow_244079_244632	-1	-1	1
JB929_Segkk33arrow_246916_247973	-1	-1	1
JB874_Segkk12arrow_838042_838920	-1	-1	1
JB929_Segkk11arrow_2291817_2292919	-1	-1	1
JB837_Segkk11arrow_281831_282879	-1	-1	1
JB864_Segkk46arrow_635138_636242	-1	-1	1
JB953_Segkk14arrow_243197_244309	-1	-1	1
JB943_Segkk0arrow_871273_872372	-1	-1	1
JB854_Segkk6arrow_258521_259580	-1	-1	1
JB943_Segkk0arrow_873535_874658	-1	-1	1
JB4_Segkk5arrow_278509_279815	-1	-1	1
DY34373_Segkk14arrow_1040827_1041973	-1	-1	1
JB1206_Segkk5arrow_1083284_1084430	-1	-1	1
JB1180_unitig_66quiver_475023_476168	-1	-1	1
JB929_Segkk33arrow_1048814_1049959	-1	-1	1
JB4_Segkk5arrow_1072446_1073591	-1	-1	1
JB929_Segkk11arrow_2099818_2101150	-1	-1	1
JB4_Segkk8arrow_653350_654683	-1	-1	1
JB864_Segkk46arrow_450412_451766	-1	-1	1
JB938_Segkk74arrow_1219532_1220853	-1	-1	1
JB953_Segkk1arrow_8080511_8081801	-1	-1	1
JB953_Segkk14arrow_241251_242335	-1	-1	1
DY39827_Segkk12arrow_642044_643531	-1	-1	1
JB864_Segkk46arrow_259966_261501	-1	-1	1
JB837_Segkk11arrow_474387_475971	0	1	0
JB864_Segkk51arrow_796175_797767	1	1	0
JB874_Segkk10arrow_967397_968929	1	1	0
JB953_Segkk1arrow_7943576_7945117	1	1	0
JB943_Segkk9arrow_1251845_1253515	1	1	0
JB873_Segkk0arrow_202804_204360	1	1	0
JB760_Segkk27arrow_269344_269478	1	1	0
JB1180_unitig_9quiver_308873_309778	-1	1	0
JB879_Segkk60arrow_251549_252604	-1	1	0
JB869_Segkk2arrow_5066916_5067971	-1	1	0
JB758_Segkk10arrow_520099_521156	-1	1	0
JB938_Segkk74arrow_1350055_1351173	-1	1	0
JB22_Segkk6arrow_714065_715183	-1	1	0
JB869_Segkk6arrow_106763_107881	-1	1	0
JB943_Segkk0arrow_814025_815142	-1	1	0
JB22_Segkk9arrow_18028_18418	-1	1	0
JB938_Segkk89arrow_1503320_1503710	-1	1	0
JB760_Segkk39arrow_94304_94694	-1	1	0
JB869_Segkk9arrow_264911_265994	-1	1	0
JB1180_unitig_65quiver_225656_226737	-1	1	0
JB840_Segkk22arrow_584805_585865	-1	1	0
JB879_Segkk37arrow_29394_30536	-1	1	0
JB1180_unitig_19quiver_21250_22439	-1	1	0
JB943_Segkk29arrow_500670_501859	-1	1	0
JB929_Segkk25arrow_468956_470145	-1	1	0
DY39827_Segkk17arrow_911935_913252	-1	1	0
JB1206_Segkk5arrow_433846_435162	-1	1	0
JB879_Segkk78arrow_35894_37222	-1	1	0
JB840_Segkk15arrow_939232_940645	-1	1	0
JB864_Segkk51arrow_822800_824216	-1	1	0
JB22_Segkk1arrow_318263_319613	-1	1	0
JB4_Segkk5arrow_733497_734807	-1	1	0
JB873_Segkk55arrow_287721_289031	-1	1	0
wtf24_ref	-1	1	0
JB938_Segkk52arrow_512469_513769	-1	1	0
JB879_Segkk78arrow_152624_153924	-1	1	0
JB760_Segkk36arrow_166578_167878	-1	1	0
DY34373_Segkk14arrow_318247_319601	-1	1	0
JB1206_Segkk5arrow_360801_362155	-1	1	0
JB953_Segkk13arrow_798732_800151	-1	1	0
JB4_Segkk7arrow_6676_7708	-1	1	0
JB1206_Segkk5arrow_669101_670666	-1	1	0
JB1206_Segkk3arrow_250161_251701	1	-1	0
DY34373_Segkk10arrow_1209621_1211305	1	-1	0
JB1206_Segkk5arrow_4760631_4762301	1	-1	0
JB864_Segkk69arrow_1000532_1002027	1	-1	0
JB874_Segkk10arrow_1083366_1084862	1	-1	0
JB854_Segkk20arrow_1025630_1027126	1	-1	0
DY39827_Segkk17arrow_259169_260271	-1	-1	0
JB874_Segkk10arrow_281905_283007	-1	-1	0
JB837_Segkk11arrow_1370877_1371979	-1	-1	0
JB840_Segkk15arrow_259654_260756	-1	-1	0
JB854_Segkk1arrow_259955_261057	-1	-1	0
JB943_Segkk8arrow_268903_270005	-1	-1	0
JB864_Segkk51arrow_152490_153592	-1	-1	0
JB1180_unitig_74quiver_123788_124900	-1	-1	0
JB1206_Segkk3arrow_252615_253659	-1	-1	0
JB874_Segkk12arrow_783356_784266	-1	-1	0
JB953_Segkk13arrow_801050_801957	-1	-1	0
JB879_Segkk2arrow_325_1375	-1	-1	0
JB1180_unitig_66quiver_56374_57423	-1	-1	0
JB874_Segkk10arrow_688795_689843	-1	-1	0
JB943_Segkk8arrow_686728_687776	-1	-1	0
JB929_Segkk5arrow_6814_7348	-1	-1	0
wtf12_ref	-1	-1	0
DY39827_Segkk17arrow_263263_264405	-1	-1	0
JB943_Segkk8arrow_272998_274140	-1	-1	0
JB840_Segkk15arrow_263749_264891	-1	-1	0
JB854_Segkk1arrow_264050_265192	-1	-1	0
JB837_Segkk11arrow_1372761_1374037	-1	-1	0
JB874_Segkk10arrow_285998_286916	-1	-1	0
JB864_Segkk51arrow_156585_157727	-1	-1	0
JB953_Segkk14arrow_390772_392091	-1	-1	0
DY39827_Segkk17arrow_940452_941767	-1	-1	0
JB840_Segkk15arrow_261538_262685	-1	-1	0
JB854_Segkk1arrow_261839_262986	-1	-1	0
JB864_Segkk51arrow_154374_155521	-1	-1	0
JB943_Segkk8arrow_270787_271934	-1	-1	0
wtf8_ref	-1	-1	0
JB879_Segkk61arrow_185715_187033	-1	-1	0
JB760_Segkk36arrow_809608_810926	-1	-1	0
JB869_Segkk9arrow_76666_77984	-1	-1	0
JB1206_Segkk2arrow_241465_242951	-1	-1	0
JB943_Segkk8arrow_1058446_1059579	0	1	1
JB938_Segkk74arrow_84568_86139	0	1	1
JB869_Segkk11arrow_885665_887236	0	1	1
JB760_Segkk23arrow_105406_106977	0	1	1
JB22_Segkk1arrow_846981_848552	0	1	1
JB4_Segkk5arrow_665487_667024	0	1	1
JB929_Segkk33arrow_636485_638022	0	1	1
JB873_Segkk55arrow_219710_221247	0	1	1
DY34373_Segkk17arrow_488376_489752	0	1	1
JB837_Segkk3arrow_445097_446635	0	1	1
JB953_Segkk14arrow_316561_317965	0	1	1
JB854_Segkk21arrow_452525_454011	0	1	1
JB840_Segkk22arrow_454619_456105	0	1	1
DY39827_Segkk12arrow_856632_858100	0	1	1
JB874_Segkk12arrow_862600_864026	0	1	1
JB953_Segkk13arrow_880138_881565	0	1	1
JB873_Segkk38arrow_6533_7960	0	1	1
JB929_Segkk11arrow_2316604_2318031	0	1	1
JB943_Segkk0arrow_895804_897230	0	1	1
JB864_Segkk46arrow_657401_658828	0	1	1
DY34373_Segkk14arrow_853426_854855	0	1	1
JB1206_Segkk5arrow_895890_897319	0	1	1
JB758_Segkk18arrow_897797_899227	0	1	1
JB22_Segkk6arrow_789619_791100	0	1	1
JB4_Segkk8arrow_864805_866288	0	1	1
JB869_Segkk6arrow_182316_183818	0	1	1
JB938_Segkk74arrow_1425613_1427115	0	1	1
JB874_Segkk14arrow_527714_528939	1	1	1
JB938_Segkk52arrow_348986_350557	1	1	1
JB879_Segkk63arrow_372155_373726	1	1	1
JB840_Segkk15arrow_1020675_1022172	1	1	1
JB938_Segkk52arrow_477016_478513	1	1	1
JB879_Segkk78arrow_117185_118682	1	1	1
JB760_Segkk36arrow_126351_127947	1	1	1
DY34373_Segkk14arrow_538878_540301	1	1	1
JB1206_Segkk5arrow_581352_582775	1	1	1
JB873_Segkk18arrow_34019_35479	1	1	1
JB953_Segkk14arrow_546848_548308	1	1	1
DY34373_Segkk14arrow_694734_696251	1	1	1
JB1206_Segkk5arrow_737198_738716	1	1	1
JB1180_unitig_19quiver_310734_312373	1	1	1
JB854_Segkk6arrow_549467_551139	1	1	1
JB943_Segkk8arrow_915906_917524	1	1	1
JB840_Segkk15arrow_888858_890506	1	1	1
JB864_Segkk51arrow_772345_773996	1	1	1
JB869_Segkk11arrow_356720_358163	1	1	1
JB4_Segkk5arrow_572651_574169	1	1	1
JB929_Segkk33arrow_543657_545175	1	1	1
JB873_Segkk55arrow_126875_128393	1	1	1
JB837_Segkk11arrow_2042009_2043565	1	1	1
JB837_Segkk11arrow_2015566_2017132	1	1	1
JB840_Segkk15arrow_912693_914244	1	1	1
JB874_Segkk10arrow_937770_939279	1	1	1
JB943_Segkk8arrow_970504_972068	1	1	1
JB758_Segkk18arrow_739028_740594	1	1	1
DY39827_Segkk12arrow_775027_776624	1	1	1
JB4_Segkk5arrow_349051_350573	1	1	1
JB873_Segkk39arrow_318220_319726	1	1	1
JB929_Segkk33arrow_317222_318744	1	1	1
JB854_Segkk6arrow_329076_330598	1	1	1
wtf19_ref	1	1	1
wtf23_ref	1	1	1
wtf14_ref	-1	1	1
JB879_Segkk77arrow_162130_163047	-1	1	1
JB943_Segkk8arrow_510273_511190	-1	1	1
JB874_Segkk10arrow_517895_519415	-1	1	1
JB840_Segkk15arrow_499157_500074	-1	1	1
DY39827_Segkk17arrow_500115_501032	-1	1	1
JB837_Segkk11arrow_1599971_1600888	-1	1	1
JB864_Segkk51arrow_381145_382062	-1	1	1
JB874_Segkk12arrow_753220_754130	-1	1	1
JB758_Segkk17arrow_292392_293299	-1	1	1
wtf15_ref	-1	1	1
JB879_Segkk77arrow_164517_165634	-1	1	1
JB943_Segkk8arrow_512660_513777	-1	1	1
JB874_Segkk10arrow_520885_522002	-1	1	1
JB840_Segkk15arrow_501544_502661	-1	1	1
wtf11_ref	-1	1	1
JB22_Segkk1arrow_1028509_1029606	-1	1	1
JB879_Segkk37arrow_27243_28340	-1	1	1
wtf1_ref	-1	1	1
JB938_Segkk78arrow_229612_230667	-1	1	1
JB4_Segkk6arrow_1246750_1247805	-1	1	1
JB854_Segkk0arrow_1239062_1240117	-1	1	1
DY34373_Segkk10arrow_1212213_1213270	-1	1	1
JB1206_Segkk5arrow_4763209_4764266	-1	1	1
JB854_Segkk20arrow_1028036_1029074	-1	1	1
JB864_Segkk69arrow_1002938_1003976	-1	1	1
JB4_Segkk4arrow_1046454_1047495	-1	1	1
wtf10_ref	-1	1	1
JB760_Segkk36arrow_997762_998846	-1	1	1
JB879_Segkk80arrow_50910_51994	-1	1	1
JB854_Segkk21arrow_582661_583743	-1	1	1
JB864_Segkk46arrow_580860_581768	-1	1	1
JB929_Segkk11arrow_2237597_2238420	-1	1	1
JB758_Segkk18arrow_673030_674116	-1	1	1
JB874_Segkk10arrow_906662_907764	-1	1	1
DY34373_Segkk14arrow_210438_211499	-1	1	1
JB1206_Segkk5arrow_252991_254052	-1	1	1
JB758_Segkk18arrow_235118_236179	-1	1	1
JB953_Segkk14arrow_203260_204325	-1	1	1
JB854_Segkk6arrow_221188_222271	-1	1	1
JB929_Segkk33arrow_209581_210663	-1	1	1
JB873_Segkk39arrow_201251_202334	-1	1	1
JB4_Segkk5arrow_241165_242248	-1	1	1
JB837_Segkk11arrow_1771478_1772525	-1	1	1
JB854_Segkk6arrow_642482_643529	-1	1	1
JB22_Segkk1arrow_208616_209680	-1	1	1
JB869_Segkk11arrow_247072_248137	-1	1	1
DY34373_Segkk16arrow_475845_476902	-1	1	1
JB1206_Segkk2arrow_301533_302590	-1	1	1
JB760_Segkk36arrow_1203_2338	-1	1	1
JB840_Segkk15arrow_891413_892548	-1	1	1
JB943_Segkk8arrow_918431_919566	-1	1	1
JB864_Segkk51arrow_774903_776035	-1	1	1
JB758_Segkk17arrow_599268_600319	-1	1	1
JB760_Segkk22arrow_372754_373891	-1	1	1
JB837_Segkk11arrow_1994395_1995442	-1	1	1
JB4_Segkk5arrow_889396_890460	-1	1	1
JB854_Segkk6arrow_867686_868750	-1	1	1
JB929_Segkk33arrow_872655_873719	-1	1	1
JB873_Segkk55arrow_451791_452855	-1	1	1
wtf20_ref	-1	1	1
JB879_Segkk63arrow_374639_375795	-1	1	1
JB938_Segkk52arrow_351470_352626	-1	1	1
JB22_Segkk6arrow_792013_793114	-1	1	1
JB760_Segkk36arrow_601391_602490	-1	1	1
JB938_Segkk74arrow_1428028_1429129	-1	1	1
JB879_Segkk63arrow_156135_157235	-1	1	1
JB4_Segkk8arrow_867201_868335	-1	1	1
JB869_Segkk6arrow_184731_185865	-1	1	1
JB874_Segkk10arrow_1085773_1086885	-1	1	1
JB874_Segkk12arrow_781422_782479	-1	1	1
DY39827_Segkk17arrow_1021572_1022903	-1	1	1
JB874_Segkk10arrow_1048816_1050107	-1	1	1
DY34373_Segkk16arrow_605589_606916	-1	1	1
JB1206_Segkk2arrow_431277_432604	-1	1	1
DY34373_Segkk14arrow_391303_392619	-1	1	1
wtf21_ref	-1	1	1
JB938_Segkk52arrow_395708_397037	-1	1	1
JB760_Segkk36arrow_45419_46748	-1	1	1
DY34373_Segkk16arrow_30392_31739	-1	1	1
JB840_Segkk22arrow_5521_6867	-1	1	1
JB1206_Segkk3arrow_56653_58000	-1	1	1
JB854_Segkk21arrow_6763_8109	-1	1	1
JB837_Segkk11arrow_25987_27334	-1	1	1
JB1180_unitig_66quiver_126845_128188	-1	1	1
JB854_Segkk6arrow_708032_709375	-1	1	1
JB953_Segkk14arrow_549216_550755	-1	1	1
DY39827_Segkk17arrow_889803_891213	-1	1	1
JB758_Segkk18arrow_567397_568896	-1	1	1
JB864_Segkk51arrow_903995_905346	-1	1	1
JB874_Segkk10arrow_904455_905752	-1	1	1
JB758_Segkk18arrow_344797_346117	-1	1	1
JB1206_Segkk1arrow_3666130_3667569	-1	1	1
DY39827_Segkk20arrow_1009389_1010828	-1	1	1
JB943_Segkk8arrow_944111_945551	-1	1	1
JB1180_unitig_65quiver_333499_334874	-1	1	1
DY39827_Segkk17arrow_938186_939553	-1	1	1
wtf9_ref	-1	1	1
JB879_Segkk61arrow_245433_246785	-1	1	1
JB760_Segkk36arrow_869329_870681	-1	1	1
JB869_Segkk9arrow_136386_137738	-1	1	1
JB758_Segkk17arrow_459113_460533	-1	1	1
JB869_Segkk11arrow_727048_728358	-1	1	1
JB22_Segkk1arrow_688055_689365	-1	1	1
JB879_Segkk58arrow_42370_43680	-1	1	1
JB758_Segkk14arrow_470107_471405	-1	1	1
JB840_Segkk21arrow_503547_504836	-1	1	1
JB4_Segkk8arrow_786211_787635	-1	1	1
JB22_Segkk1arrow_620195_621725	-1	1	1
JB1180_unitig_66quiver_54056_55583	-1	1	1
JB869_Segkk11arrow_659174_660701	-1	1	1
JB953_Segkk14arrow_712931_714434	-1	1	1
DY34373_Segkk14arrow_626636_628202	-1	1	1
JB1180_unitig_66quiver_292660_294150	-1	1	1
JB758_Segkk18arrow_670196_671753	-1	1	1
JB837_Segkk11arrow_604770_606325	-1	1	1
JB837_Segkk11arrow_2125764_2127316	-1	1	1
JB873_Segkk18arrow_36406_37620	0	-1	1
DY39827_Segkk17arrow_1055804_1057027	1	-1	1
JB758_Segkk17arrow_399092_400534	1	-1	1
JB758_Segkk17arrow_205078_206352	1	-1	1
DY34373_Segkk16arrow_223913_225455	1	-1	1
JB1206_Segkk2arrow_49570_51112	1	-1	1
JB840_Segkk22arrow_392340_393792	1	-1	1
JB854_Segkk21arrow_392476_393937	1	-1	1
JB873_Segkk0arrow_142759_144220	1	-1	1
DY34373_Segkk16arrow_413401_414892	1	-1	1
JB1206_Segkk2arrow_239061_240553	1	-1	1
wtf7_ref	-1	-1	1
JB938_Segkk74arrow_1326790_1327696	-1	-1	1
JB879_Segkk61arrow_79094_80000	-1	-1	1
JB22_Segkk6arrow_690802_691708	-1	-1	1
JB760_Segkk36arrow_702774_703682	-1	-1	1
JB869_Segkk6arrow_83493_84399	-1	-1	1
DY34373_Segkk16arrow_306710_307617	-1	-1	1
JB1206_Segkk2arrow_132373_133280	-1	-1	1
DY39827_Segkk12arrow_751722_752629	-1	-1	1
JB4_Segkk8arrow_762941_763846	-1	-1	1
JB943_Segkk0arrow_790762_791669	-1	-1	1
JB837_Segkk11arrow_307551_308458	-1	-1	1
JB873_Segkk0arrow_35952_36860	-1	-1	1
JB840_Segkk22arrow_285576_286481	-1	-1	1
JB864_Segkk46arrow_557593_558497	-1	-1	1
JB929_Segkk11arrow_2214323_2215228	-1	-1	1
JB953_Segkk13arrow_775435_776340	-1	-1	1
JB854_Segkk21arrow_285717_286622	-1	-1	1
JB864_Segkk51arrow_383173_384287	-1	-1	1
DY39827_Segkk17arrow_502141_503255	-1	-1	1
JB837_Segkk11arrow_1601968_1603082	-1	-1	1
wtf5_ref	-1	-1	1
JB879_Segkk61arrow_2332_3446	-1	-1	1
JB760_Segkk36arrow_626002_627116	-1	-1	1
JB854_Segkk21arrow_208959_210073	-1	-1	1
DY34373_Segkk16arrow_226370_227415	-1	-1	1
JB1206_Segkk2arrow_52027_53072	-1	-1	1
JB837_Segkk11arrow_607232_608145	-1	-1	1
DY39827_Segkk17arrow_892121_892777	-1	-1	1
DY34373_Segkk16arrow_280701_281803	-1	-1	1
DY39827_Segkk12arrow_777536_778638	-1	-1	1
JB22_Segkk1arrow_622515_623563	-1	-1	1
JB869_Segkk11arrow_661492_662540	-1	-1	1
JB929_Segkk33arrow_638935_639983	-1	-1	1
JB760_Segkk27arrow_56792_57839	-1	-1	1
JB873_Segkk55arrow_222160_223208	-1	-1	1
JB4_Segkk5arrow_667937_668985	-1	-1	1
DY34373_Segkk14arrow_629114_630164	-1	-1	1
JB1206_Segkk5arrow_671578_672628	-1	-1	1
DY34373_Segkk16arrow_607829_608878	-1	-1	1
JB1206_Segkk2arrow_433517_434566	-1	-1	1
JB873_Segkk18arrow_38796_39846	-1	-1	1
JB4_Segkk8arrow_788543_789591	-1	-1	1
JB837_Segkk11arrow_227569_228617	-1	-1	1
JB758_Segkk17arrow_209922_211095	-1	-1	1
JB864_Segkk51arrow_938240_939300	-1	-1	1
JB840_Segkk15arrow_1055410_1056716	-1	-1	1
JB943_Segkk8arrow_1094621_1095927	-1	-1	1
DY39827_Segkk17arrow_261053_262199	-1	-1	1
JB874_Segkk10arrow_283789_284934	-1	-1	1
JB837_Segkk11arrow_1992119_1993487	-1	-1	1
JB837_Segkk11arrow_414369_415820	-1	-1	1
JB837_Segkk11arrow_2044474_2045806	-1	-1	1
JB837_Segkk11arrow_2165109_2166531	-1	-1	1
JB840_Segkk22arrow_394698_396031	-1	-1	1
JB874_Segkk14arrow_529825_531115	-1	-1	1
JB874_Segkk10arrow_1087747_1088831	-1	-1	1
DY34373_Segkk16arrow_415804_417291	-1	-1	1
JB758_Segkk17arrow_207520_209019	-1	-1	1
oct_chrIII_25857-26945-wtf81	-1	-1	1
oct_chrIII_10735-11751-wtf83	-1	-1	1
oct_chrI_416265-417369-wtf24	-1	-1	1
tig00000002_pilon_x4_1958511-1959591-wtf7	-1	-1	1
tig00007788_pilon_x4_28146-29218-wtf42	-1	-1	1
tig00000002_pilon_x4_155787-156968-wtf1	-1	-1	1
oct_chrI_40940-42040-wtf26	-1	-1	1
oct_chrI_406349-407469-wtf25	-1	-1	1
tig00007788_pilon_x4_394072-395204-wtf39	-1	-1	1
tig00000002_pilon_x4_234137-235275-wtf2	-1	-1	1
tig00000011_pilon_x4_226226-227321-wtf12	-1	-1	1
tig00007788_pilon_x4_863307-864390-wtf35	-1	-1	1
cry_chrI_4845249-4846294	-1	-1	1
cry_chrI_4824105-4825109	-1	-1	1
cry_chrIII_2558393-2559345	-1	-1	1
