# Supplementary material for: Recombination shapes the diversification of the wtf meiotic drivers
Source: eLife. 2026 May 11;13:RP100638. doi: 10.7554/eLife.100638 (PMC13160552; doi:10.7554/eLife.100638)
Supplement: Figure 2—source data 1. [file elife-100638-fig2-data1.xlsx]

## Sheet: Fig2C
time(h)	wt_rep1	wt_rep2	wt_rep3	wtf1_rep1	wtf1_rep2	wtf1_rep3	wtf2_rep1	wtf2_rep2	wtf2_rep3	wtf3_rep1	wtf3_rep2	wtf3_rep3	wtf4_rep1	wtf4_rep2	wtf4_rep3	wtf5_rep1	wtf5_rep2	wtf5_rep3	wtf6_rep1	wtf6_rep2	wtf6_rep3	wtf7_rep1	wtf7_rep2	wtf7_rep3	wtf8_rep1	wtf8_rep2	wtf8_rep3	wtf9_rep1	wtf9_rep2	wtf9_rep3	wtf10_rep1	wtf10_rep2	wtf10_rep3	wtf11_rep1	wtf11_rep2	wtf11_rep3	wtf12_rep1	wtf12_rep2	wtf12_rep3	wtf13_rep1	wtf13_rep2	wtf13_rep3	wtf14_rep1	wtf14_rep2	wtf14_rep3	wtf15_rep1	wtf15_rep2	wtf15_rep3	wtf16_rep1
0	0.09	0.09	0.09	0.09	0.09	0.09	0.09	0.09	0.09	0.09	0.09	0.09	0.09	0.09	0.09	0.09	0.09	0.09	0.09	0.09	0.09	0.09	0.09	0.09	0.09	0.09	0.09	0.09	0.09	0.09	0.09	0.09	0.09	0.09	0.09	0.09	0.09	0.09	0.09	0.09	0.09	0.09	0.09	0.09	0.09	0.09	0.09	0.09	0.09
2	0.137	0.11	0.1236	0.1211	0.12	0.1279	0.1312	0.1278	0.1339	0.1282	0.1325	0.1316	0.1144	0.1173	0.1108	0.1036	0.093	0.1115	0.0883	0.1001	0.1059	0.1182	0.1094	0.1157	0.1285	0.1337	0.1376	0.133	0.1252	0.1298	0.1217	0.104	0.1247	0.1118	0.111	0.1241	0.1128	0.1217	0.1346	0.1007	0.1161	0.1265	0.1112	0.1137	0.1535	0.1267	0.13	0.123	0.1126
4	0.1762	0.2092	0.1946	0.1846	0.2023	0.2272	0.2219	0.2383	0.2151	0.211	0.2852	0.2324	0.1702	0.1996	0.1928	0.166	0.1829	0.1895	0.1561	0.1601	0.1575	0.1885	0.195	0.1893	0.174	0.1854	0.1828	0.1979	0.2062	0.1963	0.198	0.1934	0.2508	0.1988	0.1952	0.2134	0.1885	0.1874	0.1937	0.1628	0.1797	0.1702	0.1955	0.1801	0.1616	0.186	0.1779	0.1674	0.1736
6	0.2615	0.2771	0.2678	0.2906	0.3065	0.2778	0.3266	0.3483	0.3204	0.3294	0.3347	0.321	0.2783	0.2952	0.2884	0.2735	0.2907	0.2773	0.237	0.2524	0.2504	0.2699	0.2832	0.2849	0.2828	0.2886	0.27	0.2945	0.3127	0.2821	0.305	0.3093	0.3063	0.2854	0.2741	0.316	0.3445	0.3196	0.3344	0.3211	0.3	0.2715	0.3128	0.3184	0.2996	0.2994	0.3212	0.2776	0.3168
8	0.4634	0.4325	0.4171	0.5341	0.5374	0.4846	0.5842	0.6059	0.6005	0.5861	0.5811	0.5829	0.5084	0.5401	0.5129	0.5359	0.5358	0.5015	0.4363	0.4523	0.4564	0.4671	0.4918	0.5018	0.5142	0.536	0.5243	0.5357	0.5373	0.5203	0.5338	0.5187	0.5272	0.4979	0.5082	0.5162	0.5662	0.6106	0.6153	0.4916	0.5542	0.4845	0.4871	0.5039	0.4379	0.5127	0.5211	0.488	0.4418
10	0.7161	0.7289	0.6756	0.7804	0.7915	0.7726	0.8441	0.8257	0.8127	0.8384	0.8306	0.7969	0.7499	0.7318	0.736	0.7679	0.7738	0.7067	0.6835	0.6671	0.6621	0.739	0.7238	0.7152	0.7614	0.7649	0.7551	0.7928	0.7918	0.7569	0.799	0.7911	0.761	0.7446	0.7468	0.6978	0.8083	0.8219	0.7857	0.7944	0.7986	0.7977	0.799	0.8044	0.7786	0.787	0.7904	0.7547	0.8198
12	1.0206	0.9927	0.9092	1.0352	1.0082	0.9723	1.0551	1.0218	1.0248	1.0571	1.0362	1.0024	1.0128	0.9843	0.97	1.035	1.0071	1.0023	0.9766	0.9444	0.9416	1.0194	1.0194	0.995	0.9917	0.9884	0.9825	0.9971	0.9856	0.9668	0.9745	0.9799	0.9641	0.963	0.9666	0.9525	1.0853	1.1117	1.0857	1.0815	1.0586	1.0268	1.081	1.0495	0.9651	1.0677	1.0389	0.9955	1.1007
14	1.2343	1.2138	1.2053	1.2471	1.2103	1.2237	1.2362	1.2234	1.2237	1.2474	1.2543	1.2461	1.2137	1.2167	1.2105	1.227	1.2216	1.201	1.2153	1.224	1.2129	1.2223	1.2227	1.2129	1.2072	1.2228	1.2303	1.1874	1.1928	1.185	1.1664	1.1747	1.1614	1.1886	1.1882	1.1761	1.2716	1.278	1.2701	1.2711	1.2852	1.2677	1.2639	1.2771	1.2695	1.3127	1.3054	1.2792	1.3038
16	1.3126	1.3105	1.3005	1.2984	1.2885	1.2841	1.2983	1.3013	1.2802	1.3037	1.3079	1.2807	1.2853	1.2965	1.2701	1.3031	1.306	1.2726	1.3226	1.3449	1.3166	1.314	1.3385	1.3093	1.316	1.3366	1.3327	1.2815	1.2831	1.2873	1.264	1.2788	1.2793	1.2849	1.2885	1.2685	1.3118	1.3202	1.2672	1.3196	1.3351	1.2557	1.3072	1.3198	1.3129	1.3491	1.3508	1.3489	1.375
18	1.3754	1.3603	1.3256	1.3539	1.326	1.3215	1.3288	1.3213	1.3137	1.3355	1.3184	1.3132	1.3261	1.3241	1.3148	1.3094	1.3259	1.3146	1.3629	1.3789	1.3521	1.3535	1.3685	1.3415	1.3693	1.3855	1.3808	1.3141	1.3229	1.3293	1.3198	1.3247	1.3195	1.3017	1.3216	1.3166	1.3095	1.3264	1.3121	1.3198	1.3168	1.2949	1.3148	1.3152	1.2819	1.3684	1.3664	1.3566	1.3246
20	1.3859	1.354	1.3286	1.3689	1.3211	1.2657	1.3639	1.3262	1.2601	1.3446	1.3103	1.2915	1.3507	1.3181	1.2892	1.3491	1.3076	1.296	1.3795	1.3626	1.3405	1.3671	1.3527	1.3276	1.3316	1.3327	1.3235	1.3053	1.3082	1.2974	1.3067	1.3131	1.3044	1.3084	1.3072	1.2928	1.3023	1.3205	1.3069	1.3124	1.3109	1.2897	1.3084	1.3082	1.2758	1.3564	1.3539	1.3471	1.3151
22	1.3793	1.3575	1.3533	1.3589	1.3127	1.3127	1.3431	1.3119	1.3051	1.3485	1.314	1.3049	1.3522	1.3187	1.3342	1.3462	1.3166	1.3095	1.3766	1.3561	1.3498	1.3629	1.3466	1.3388	1.3442	1.3474	1.3461	1.2911	1.366	1.3067	1.3245	1.3178	1.3141	1.3224	1.3145	1.3215	1.3109	1.3254	1.3214	1.3176	1.3216	1.3214	1.3085	1.3123	1.3144	1.3538	1.3475	1.3589	1.3412
24	1.3579	1.3432	1.3375	1.345	1.305	1.3046	1.328	1.3033	1.2972	1.3313	1.3044	1.2965	1.3357	1.308	1.3283	1.3293	1.3067	1.2991	1.3417	1.3078	1.314	1.3766	1.3561	1.3498	1.3314	1.3346	1.3356	1.2837	1.3605	1.3018	1.3185	1.3128	1.3092	1.3125	1.3092	1.3154	1.3167	1.3328	1.3286	1.3251	1.3276	1.3268	1.3148	1.3187	1.3211	1.3577	1.3508	1.3626	1.3544
[truncated: 29 more columns]
