# Supplementary material for: Recombination shapes the diversification of the wtf meiotic drivers
Source: eLife. 2026 May 11;13:RP100638. doi: 10.7554/eLife.100638 (PMC13160552; doi:10.7554/eLife.100638)
Supplement: Figure 3—source data 1. [file elife-100638-fig3-data1.xlsx]

## Sheet: Fig3C
cut	color	rate
Group1	Fulllenth	124.06
Group1	exon1	39.1604
Group1	deexon1	90.1098
Group2	Fulllenth	44.4223
Group2	exon1	21.6565
Group2	deexon1	25.6733
Group3	Fulllenth	9.48676
Group3	exon1	7.80764
Group3	deexon1	6.9538
Group4	Fulllenth	7.36826
Group4	exon1	5.16991
Group4	deexon1	7.17891
